# Supplementary material for: One-Pot Synthesis of Hypervalent Diaryl(iodo)bismuthanes from o-Carbonyl Iodoarenes by Zincation
Source: Hindawi journal article supplement (doi:10.1155/2019/2385064), 2019-02-27

**Supporting Information**  
**for**  
**One-pot synthesis of hypervalent diaryl(iodo)bismuthanes from *o*-carbonyl  
iodoarenes by zincation**

Toshihiro Murafuji,\* A. F. M. Hafizur Rahman, Daiki Magarifuchi, Masahiro Narita, Isamu Miyakawa, Katsuya Ishiguro and Shin Kamijo

E-mail: murafuji@yamaguchi-u.ac.jp

**Contents**

- |                                                                                                                                                                         |        |
|-------------------------------------------------------------------------------------------------------------------------------------------------------------------------|--------|
| 1. The original $^1\text{H}$ NMR spectra for <i>o</i> -carbonyl iodoarenes.                                                                                             | S1–S5  |
| 2. The original $^1\text{H}$ and $^{13}\text{C}$ NMR spectra for iodobismuthanes <b>2a</b> , <b>5a</b> , <b>6a</b> , <b>7a</b> , <b>8a</b> , <b>9a</b> and <b>10a</b> . | S6–S19 |

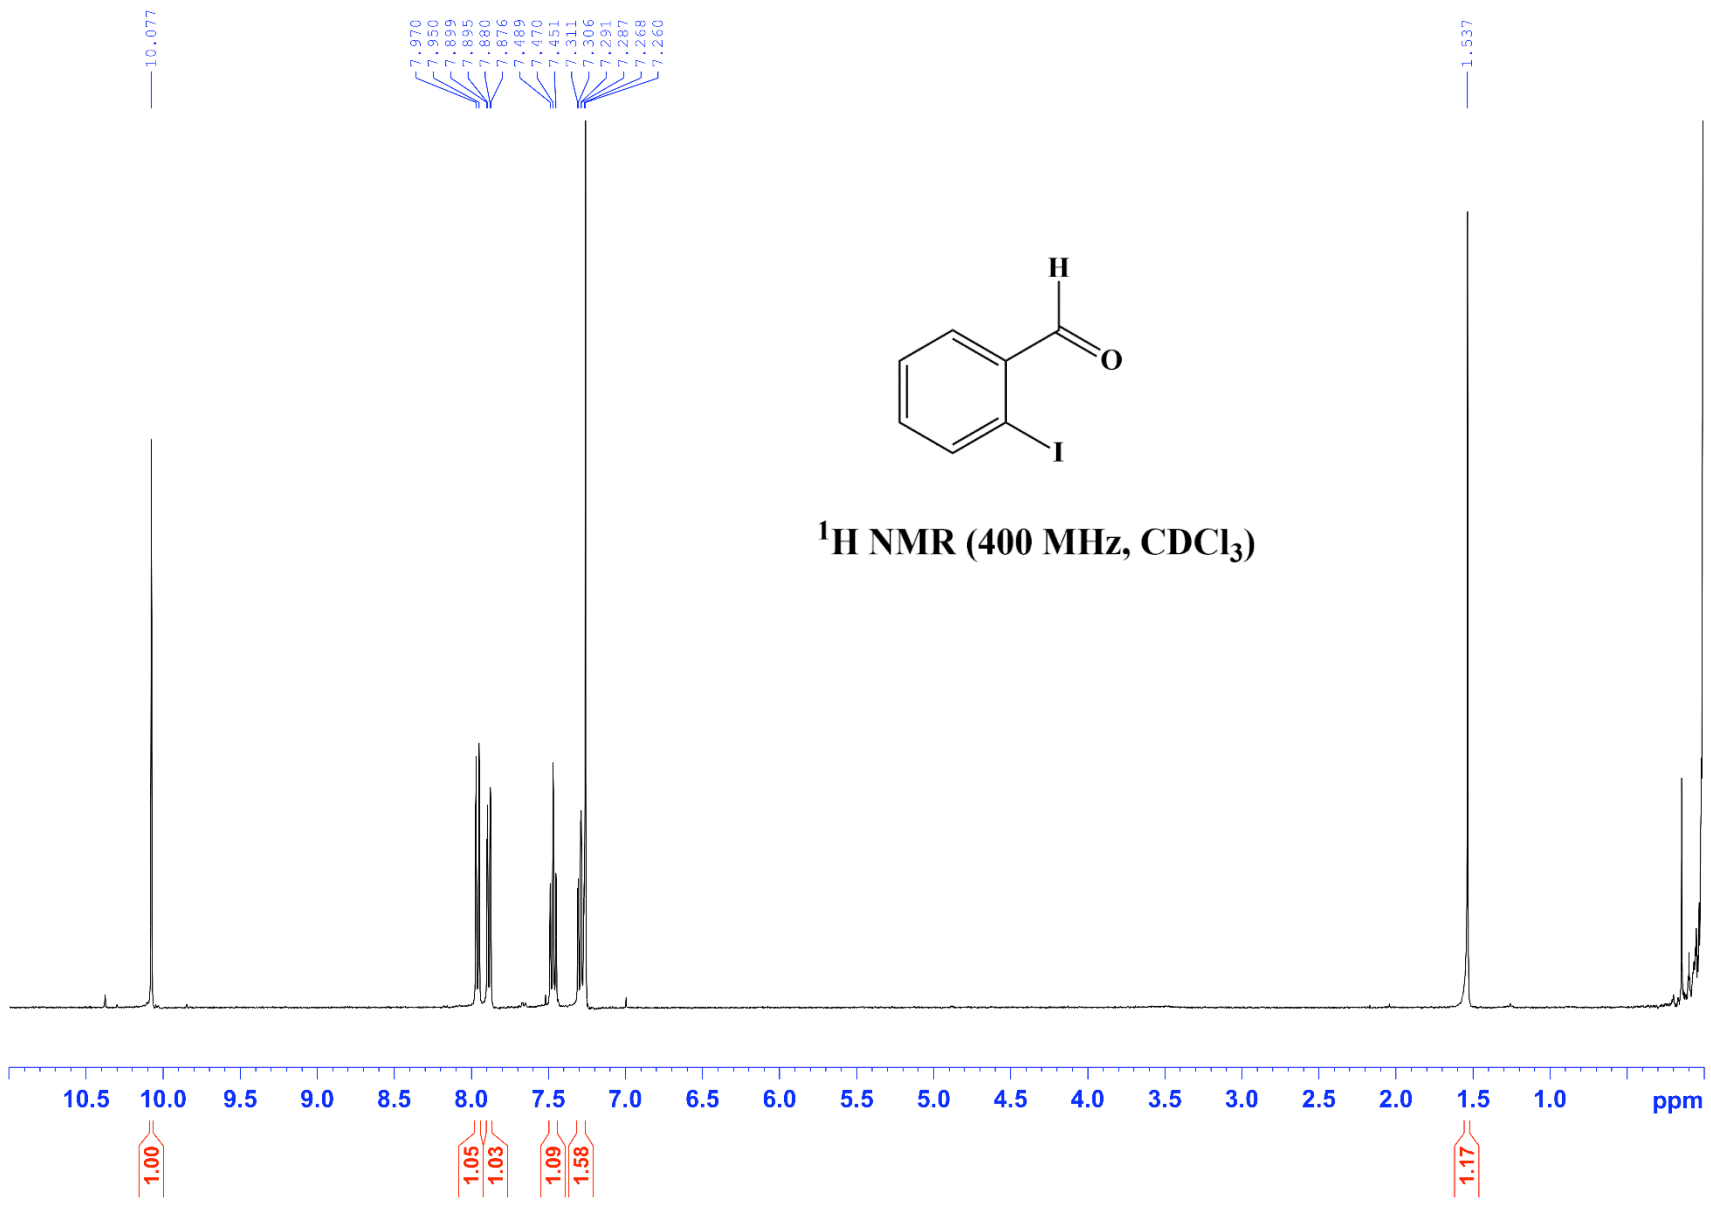

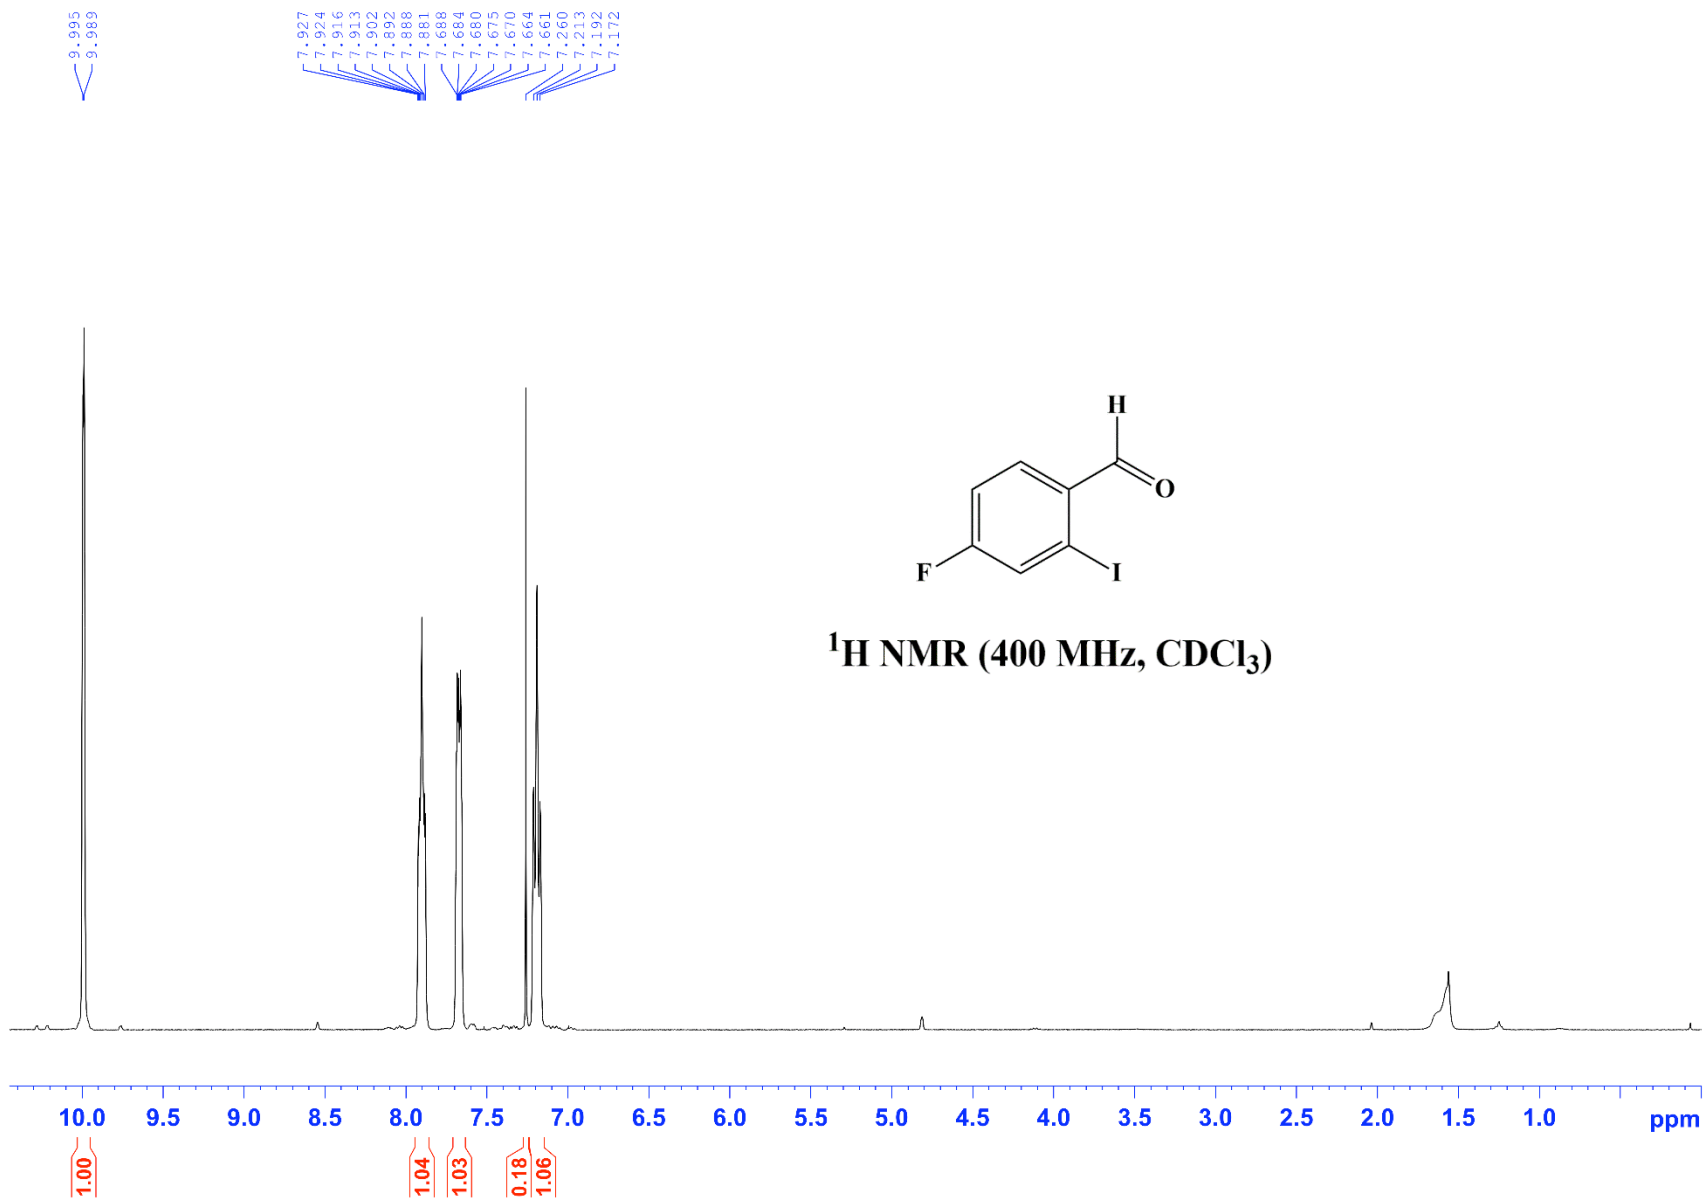

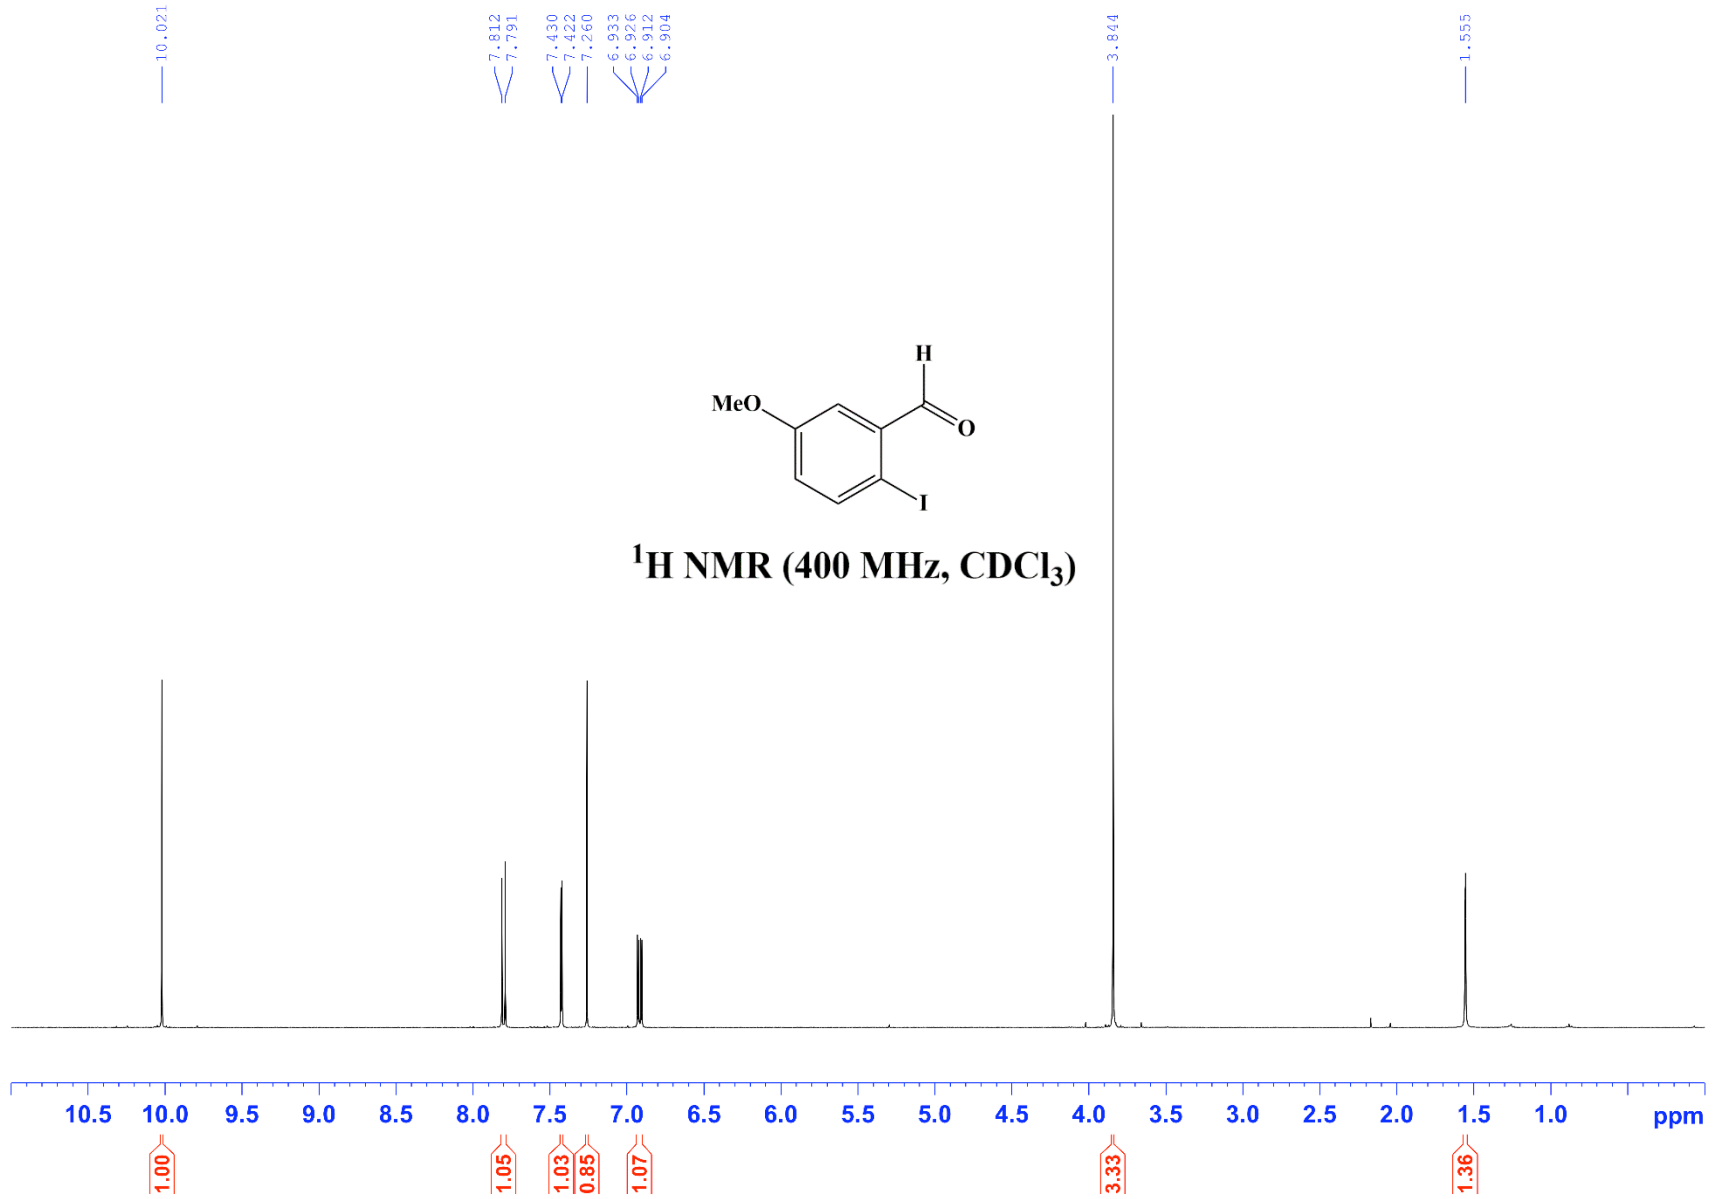

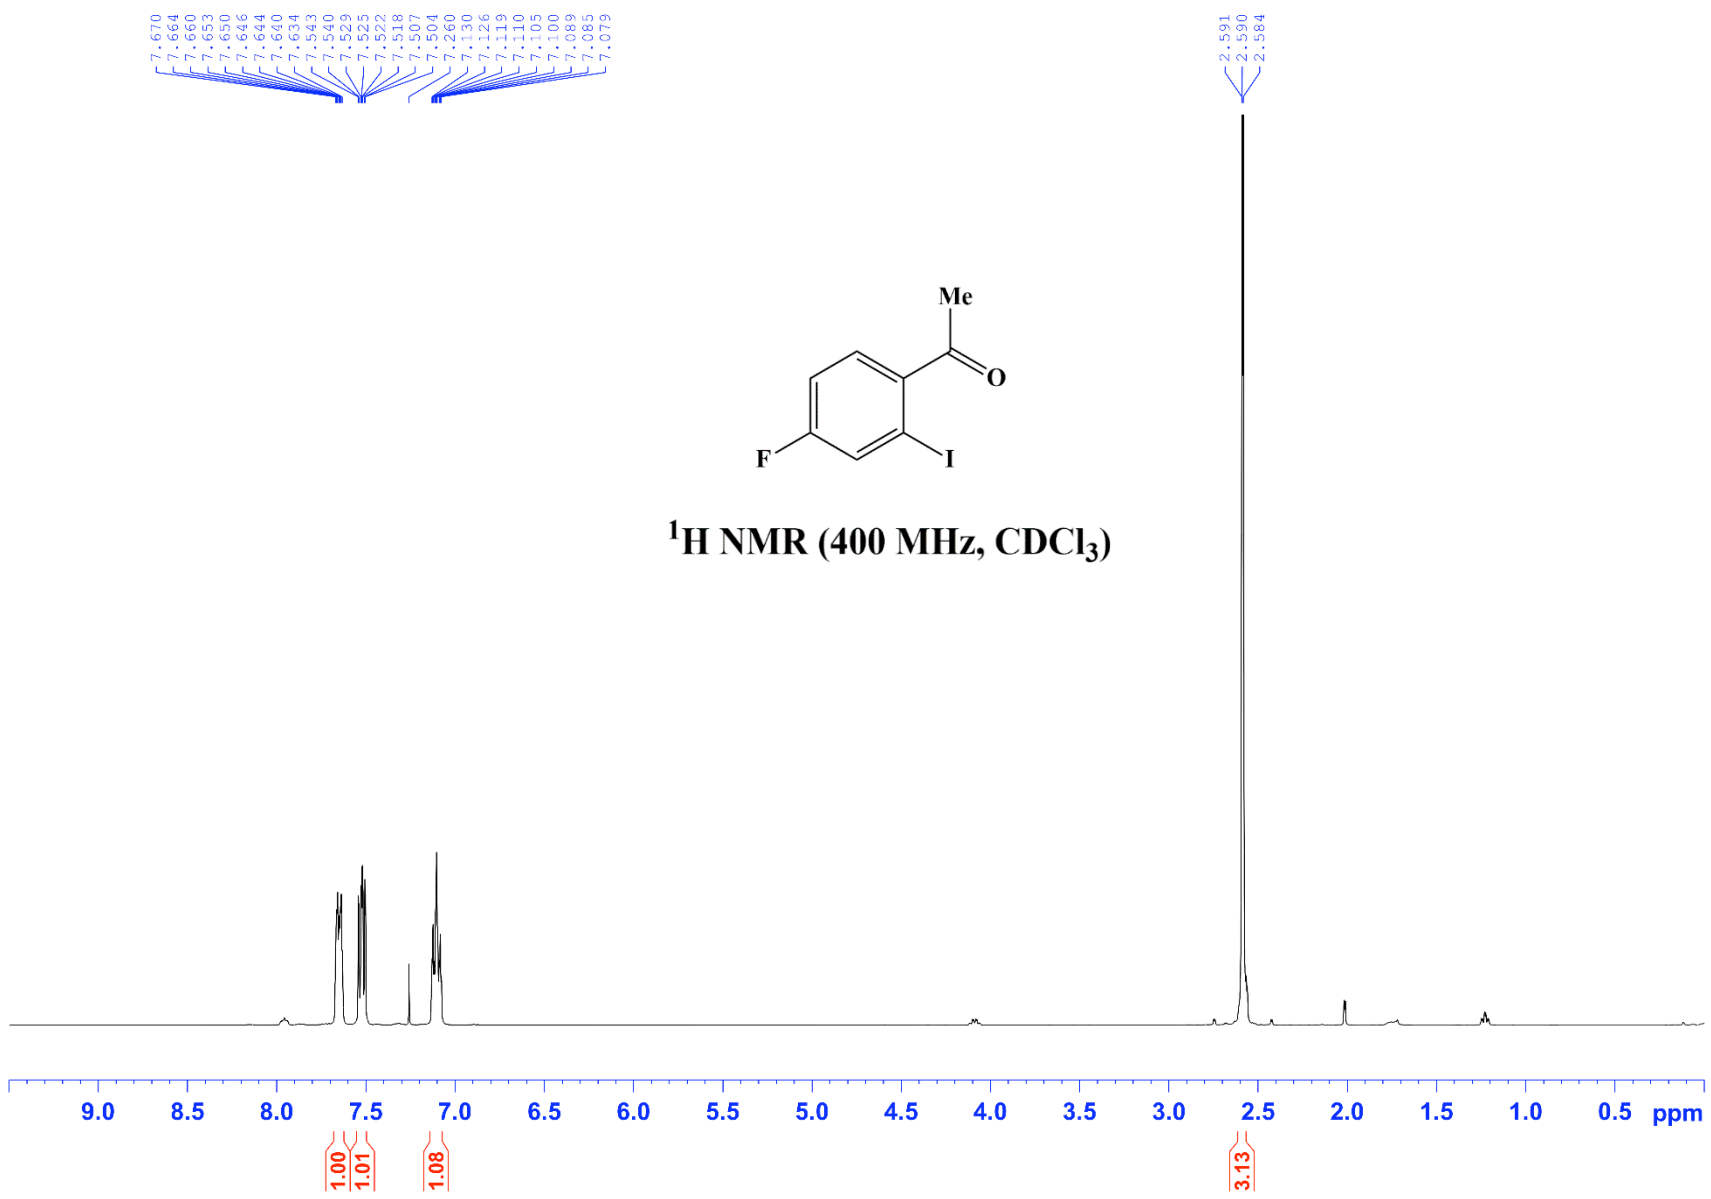

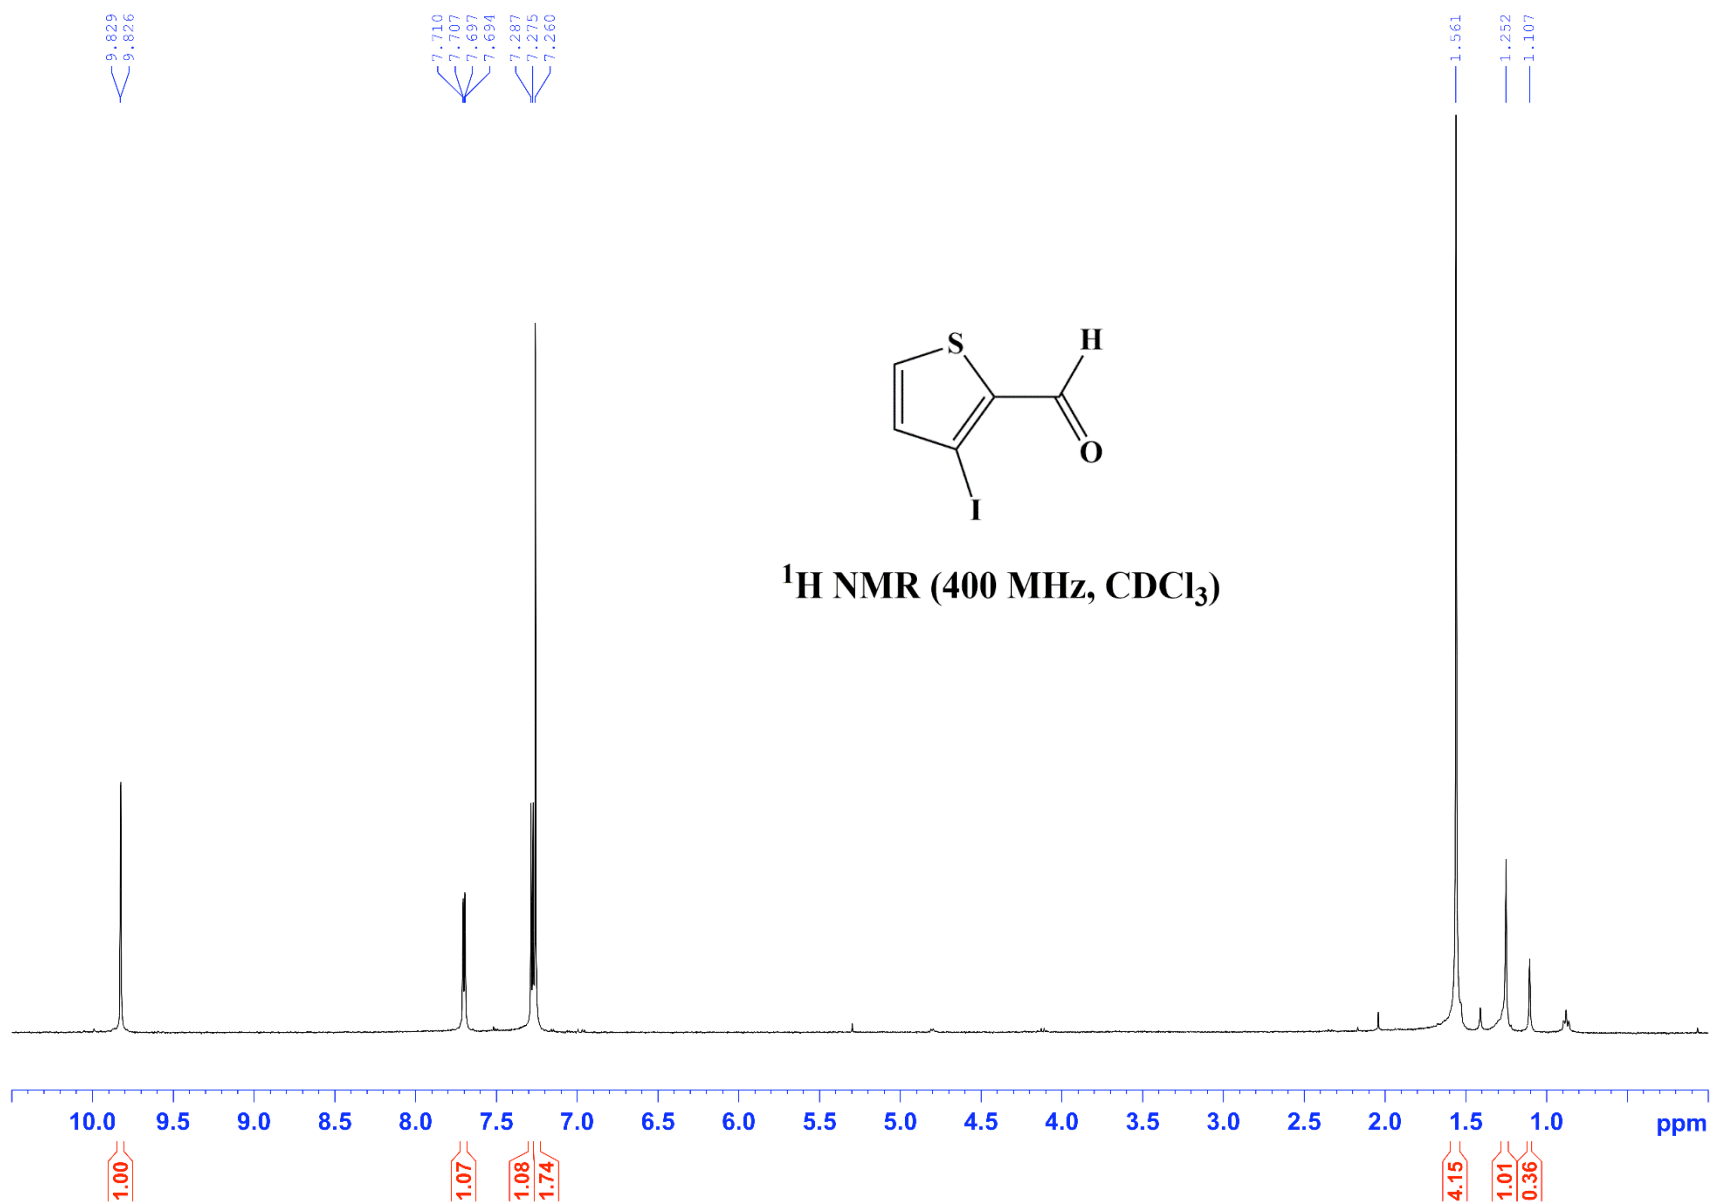

Compound 2a

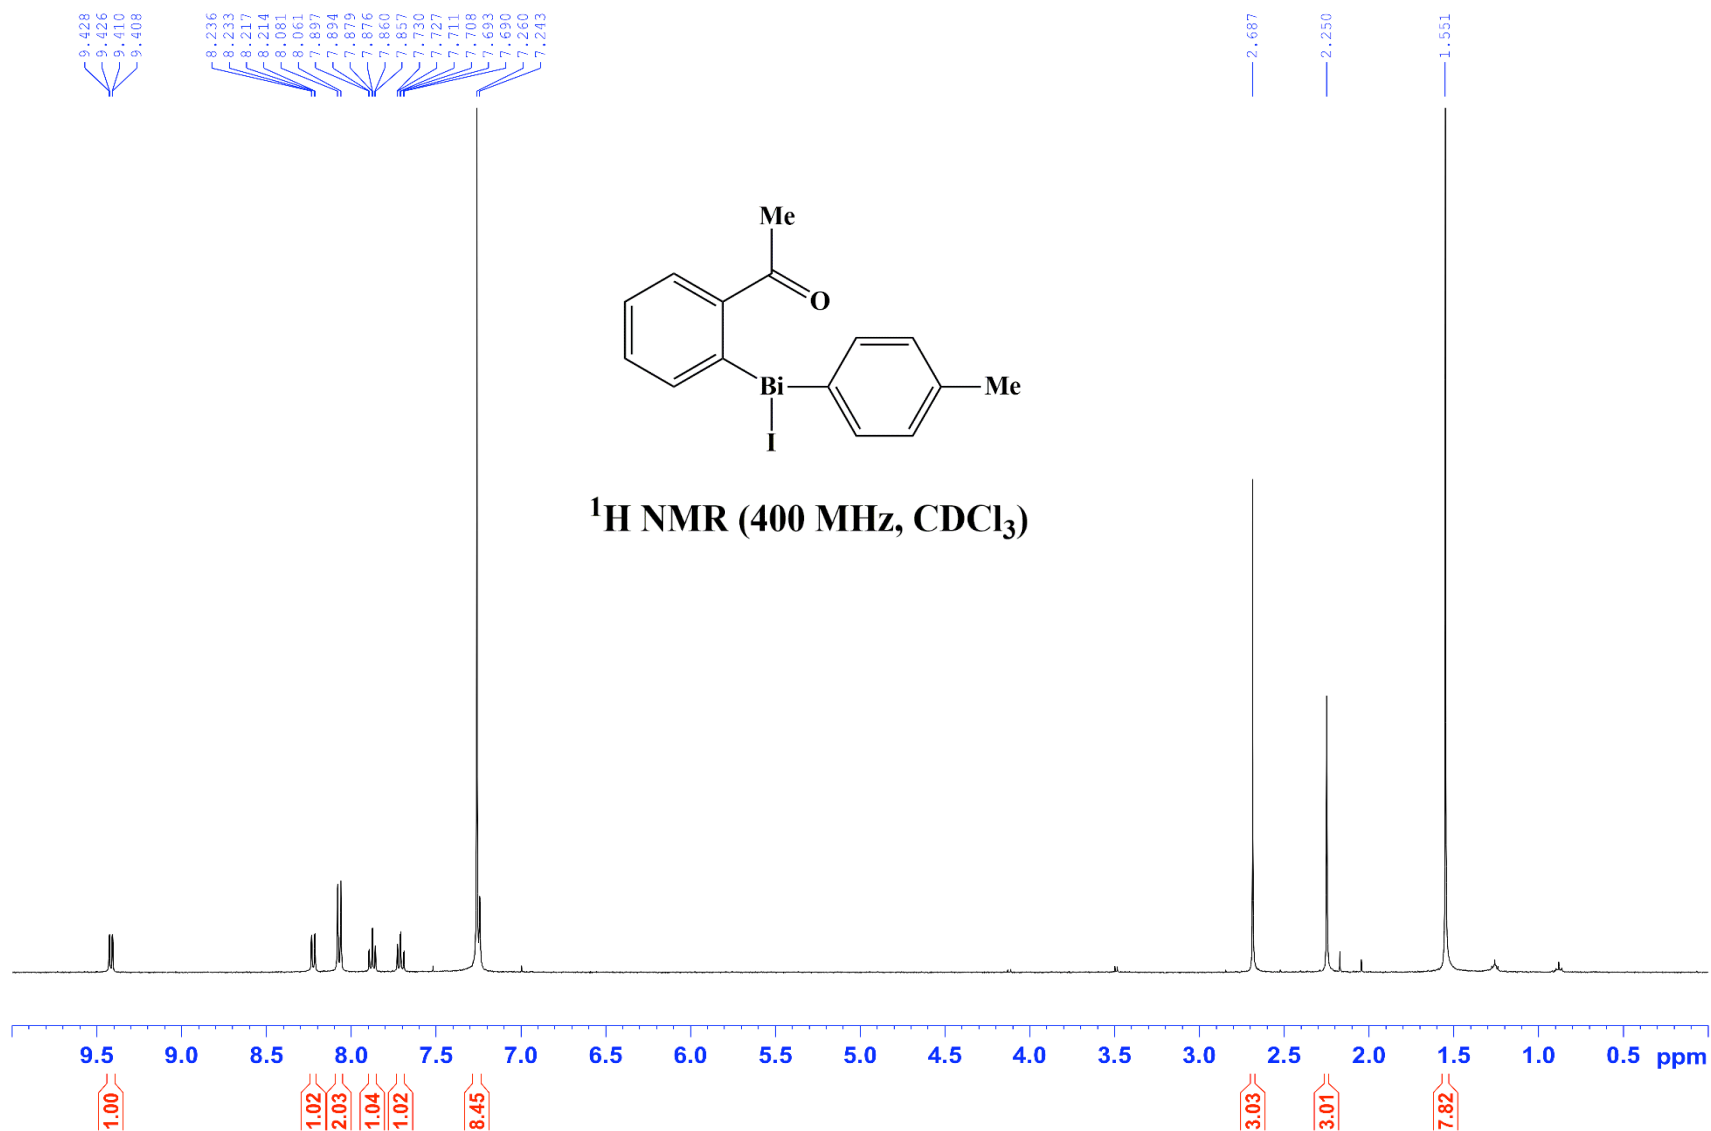

Compound 2a

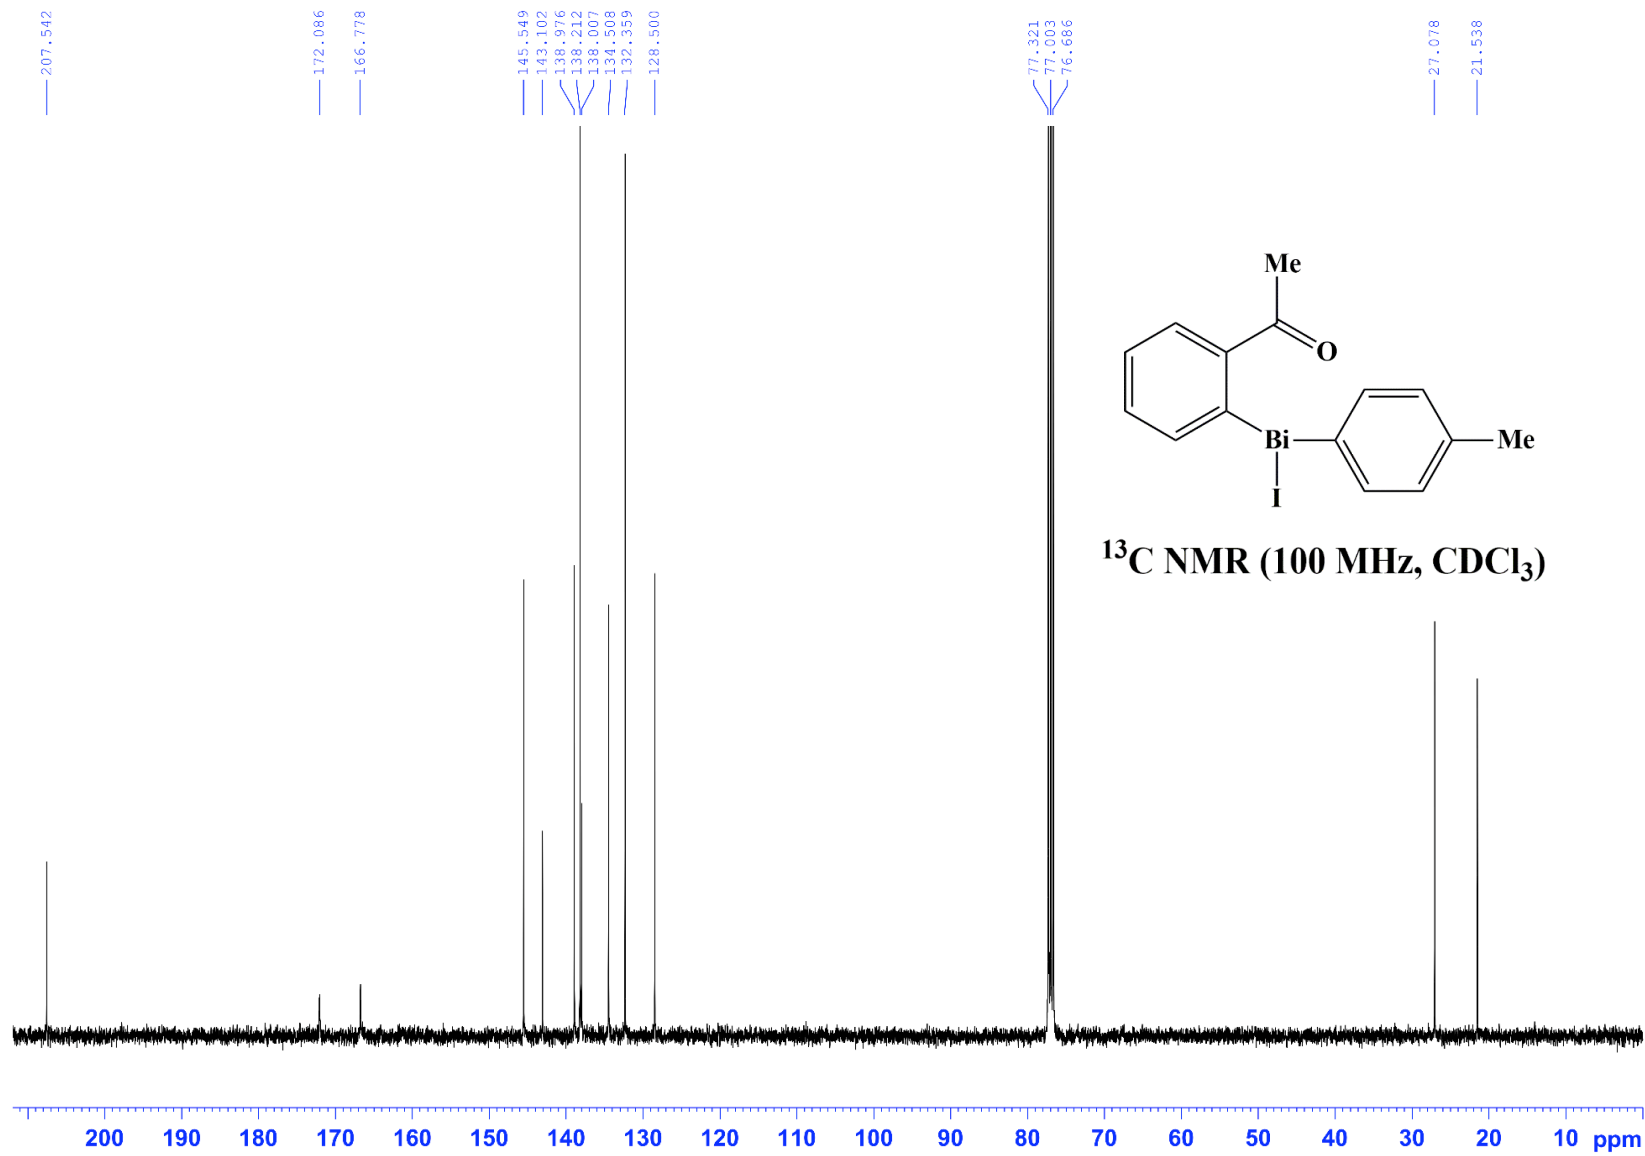



Compound 5a

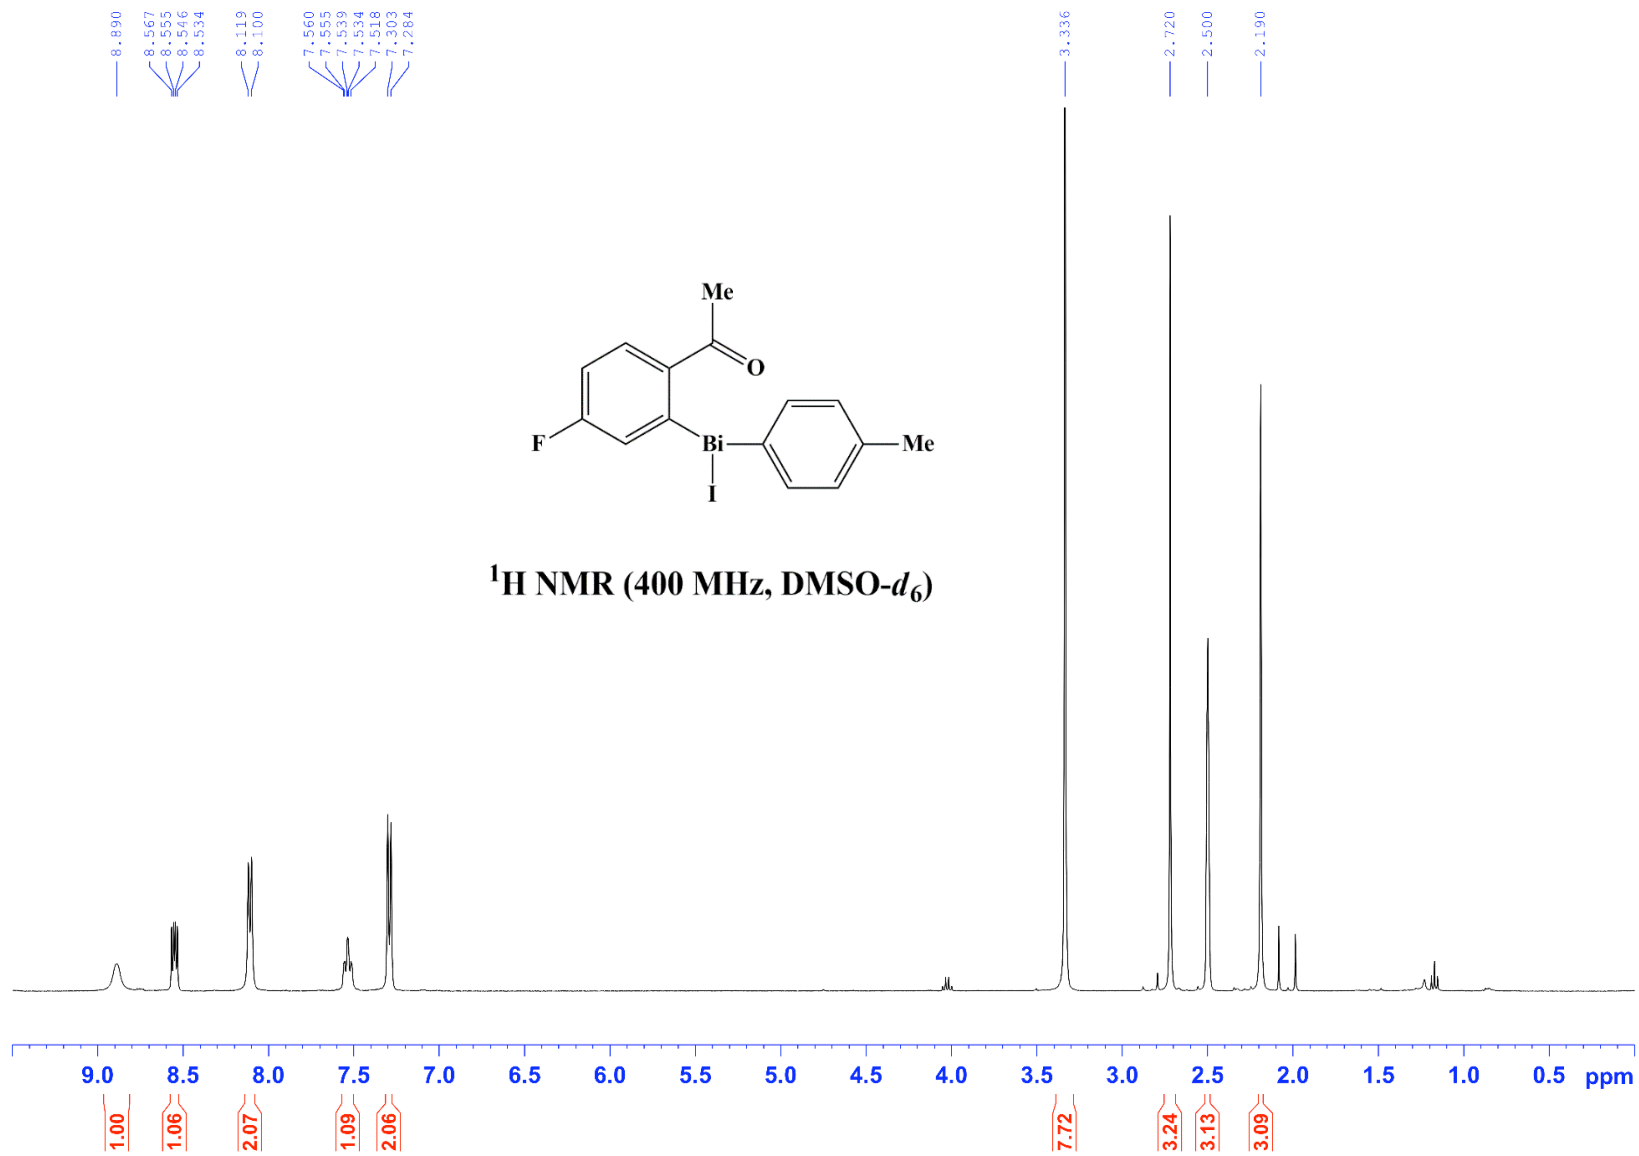

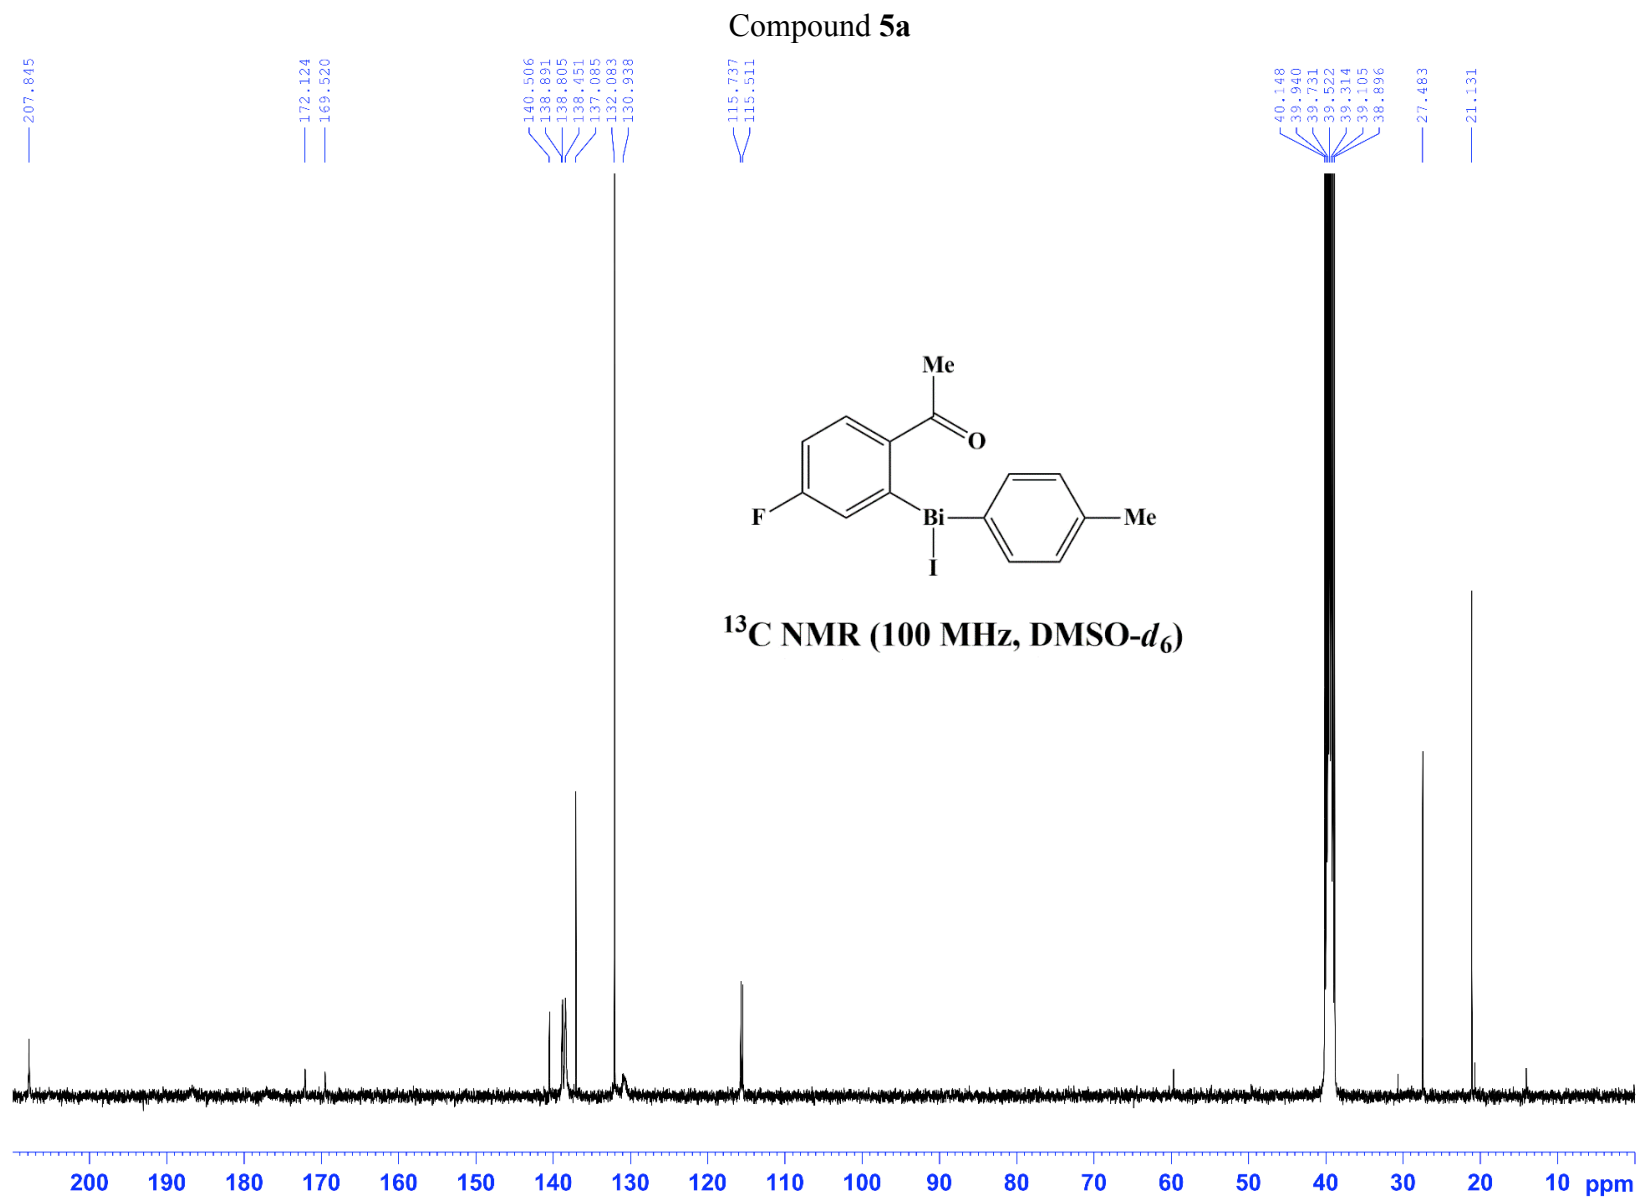

Compound 6a

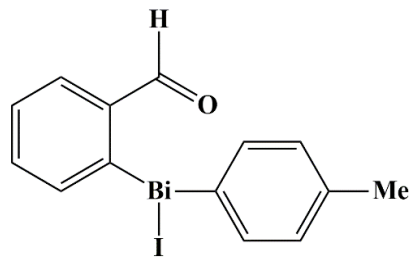

$^1\text{H NMR}$  (400 MHz,  $\text{DMSO-}d_6$ )

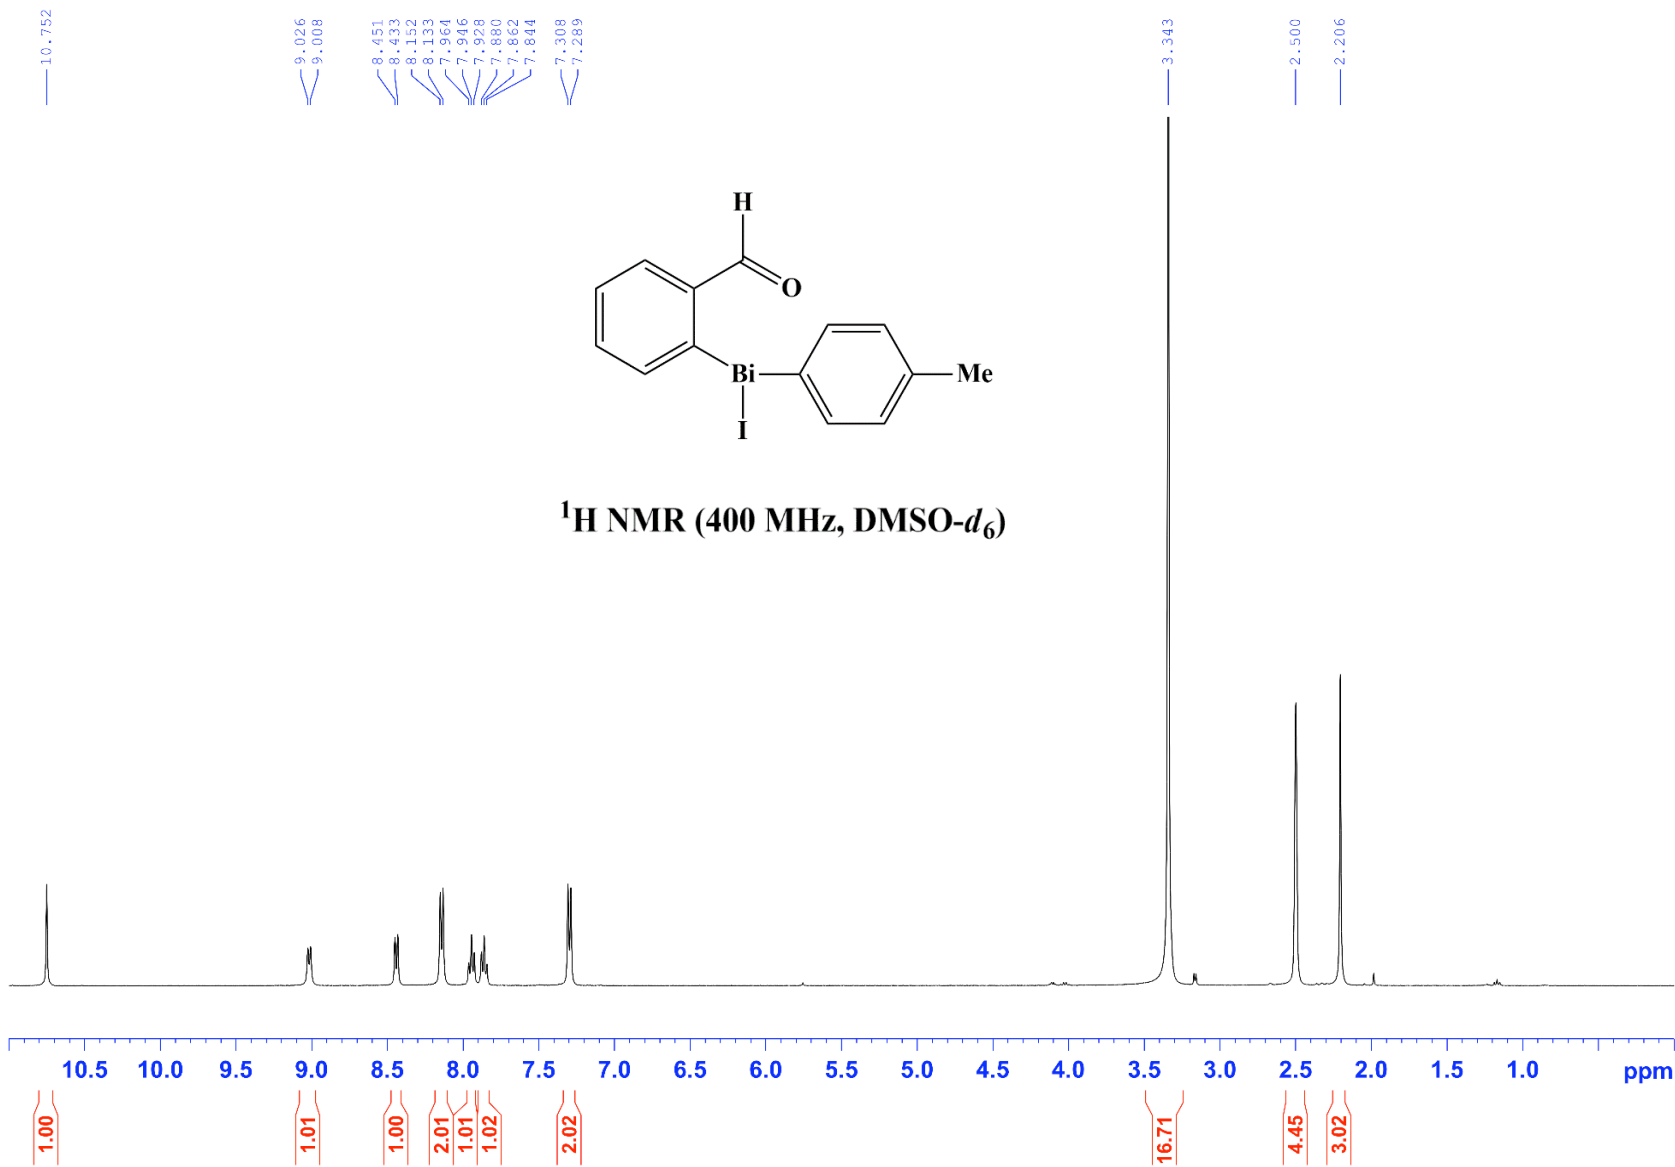

Compound 6a

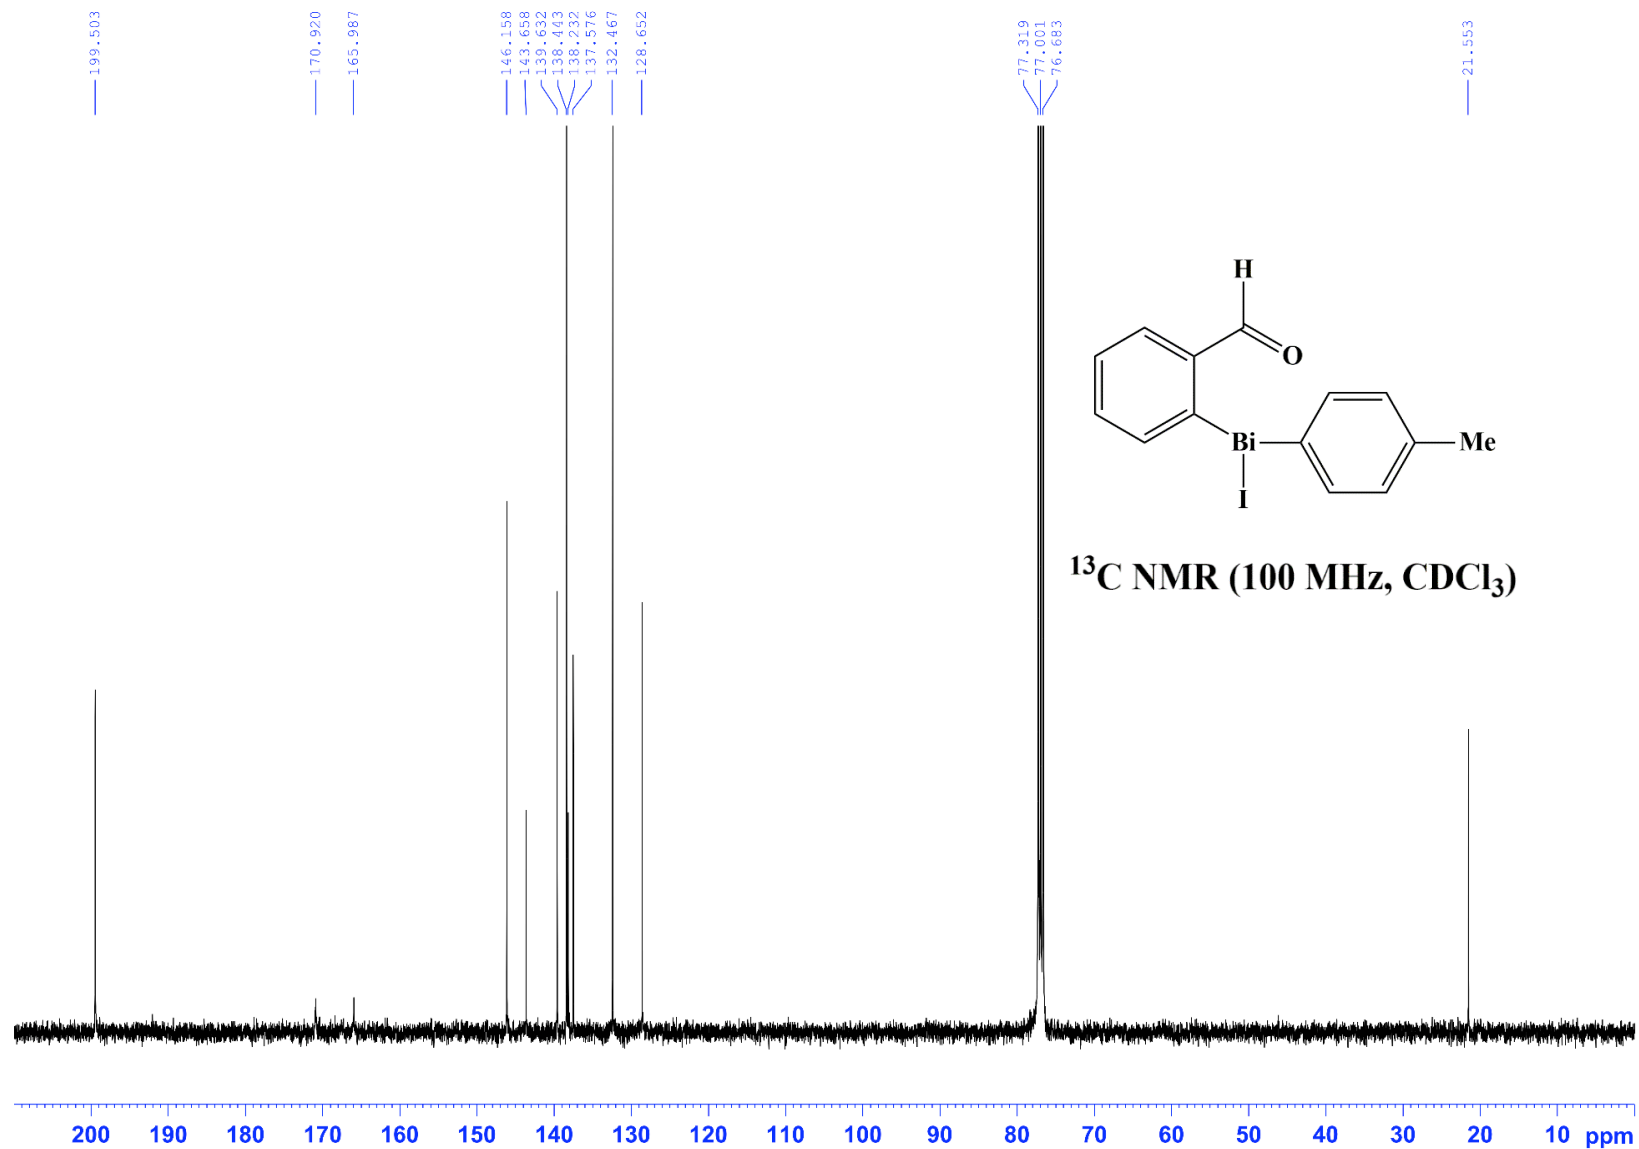

Compound 7a

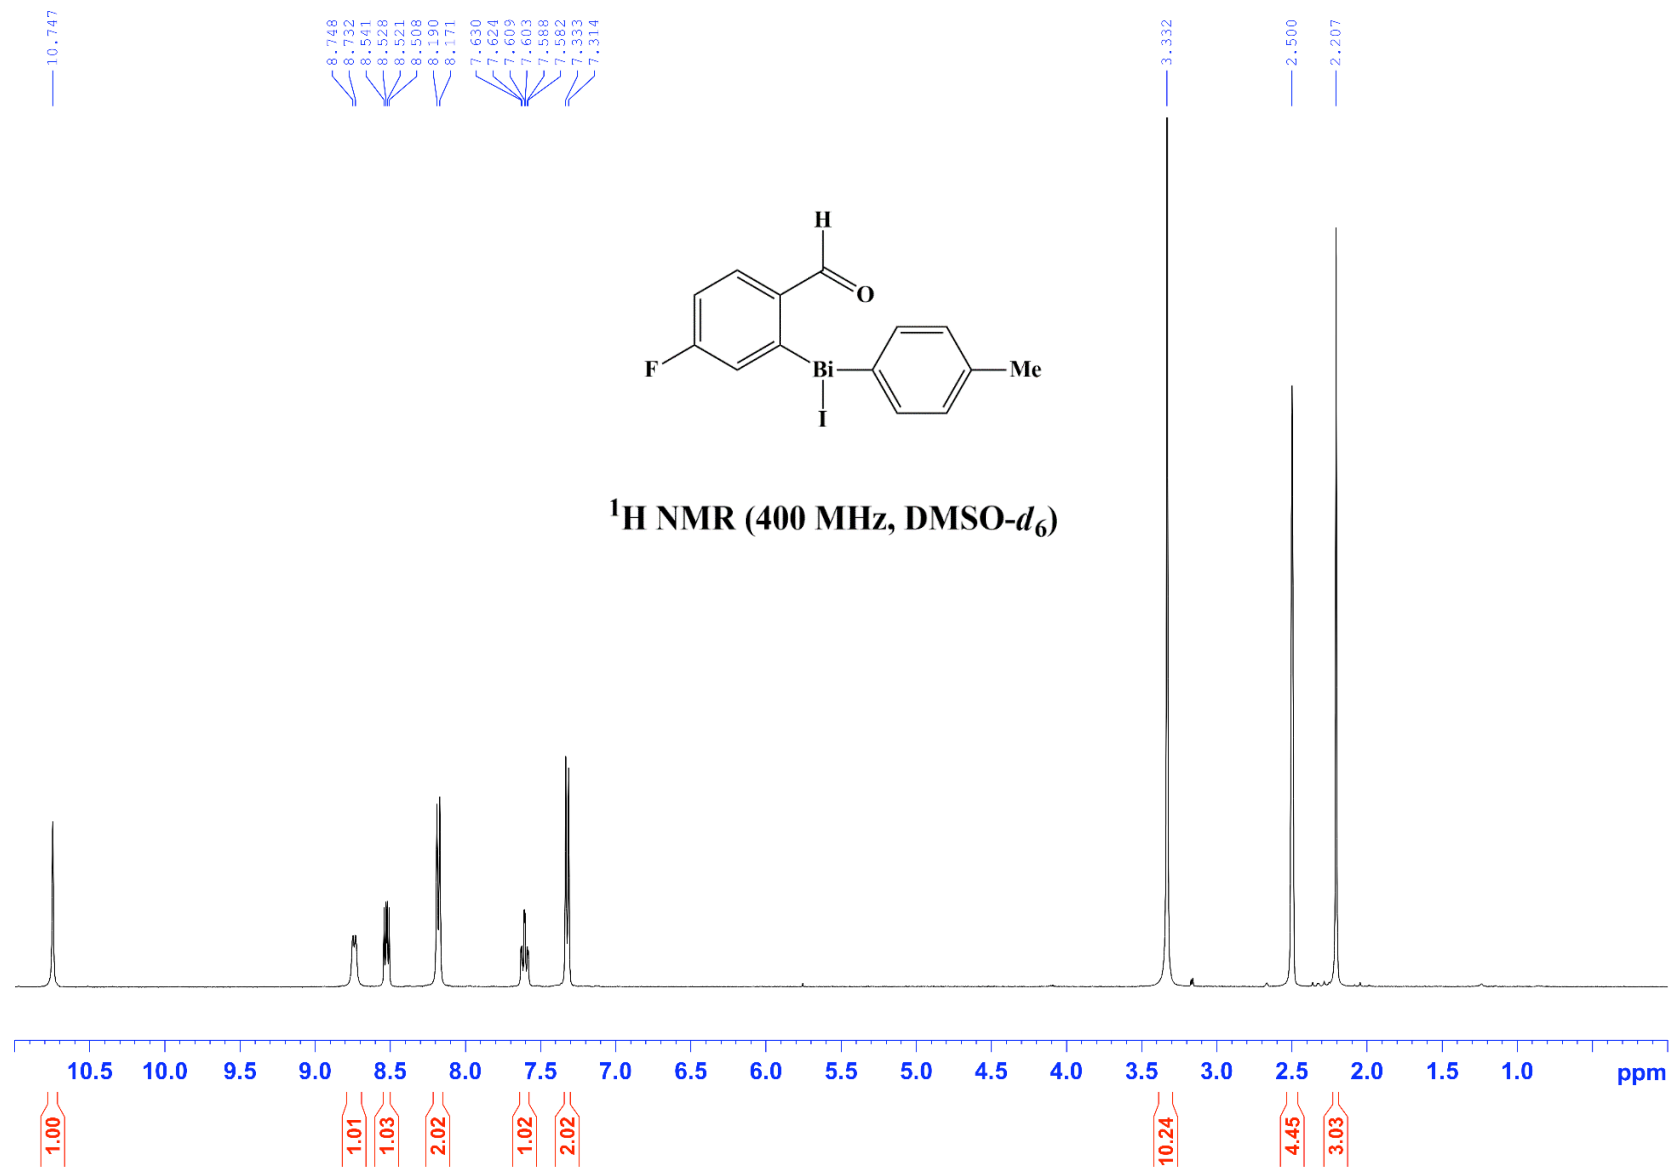

Compound 7a

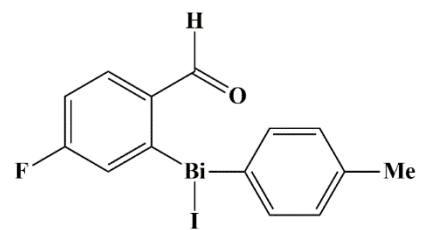

$^{13}\text{C}$  NMR (100 MHz, DMSO- $d_6$ )

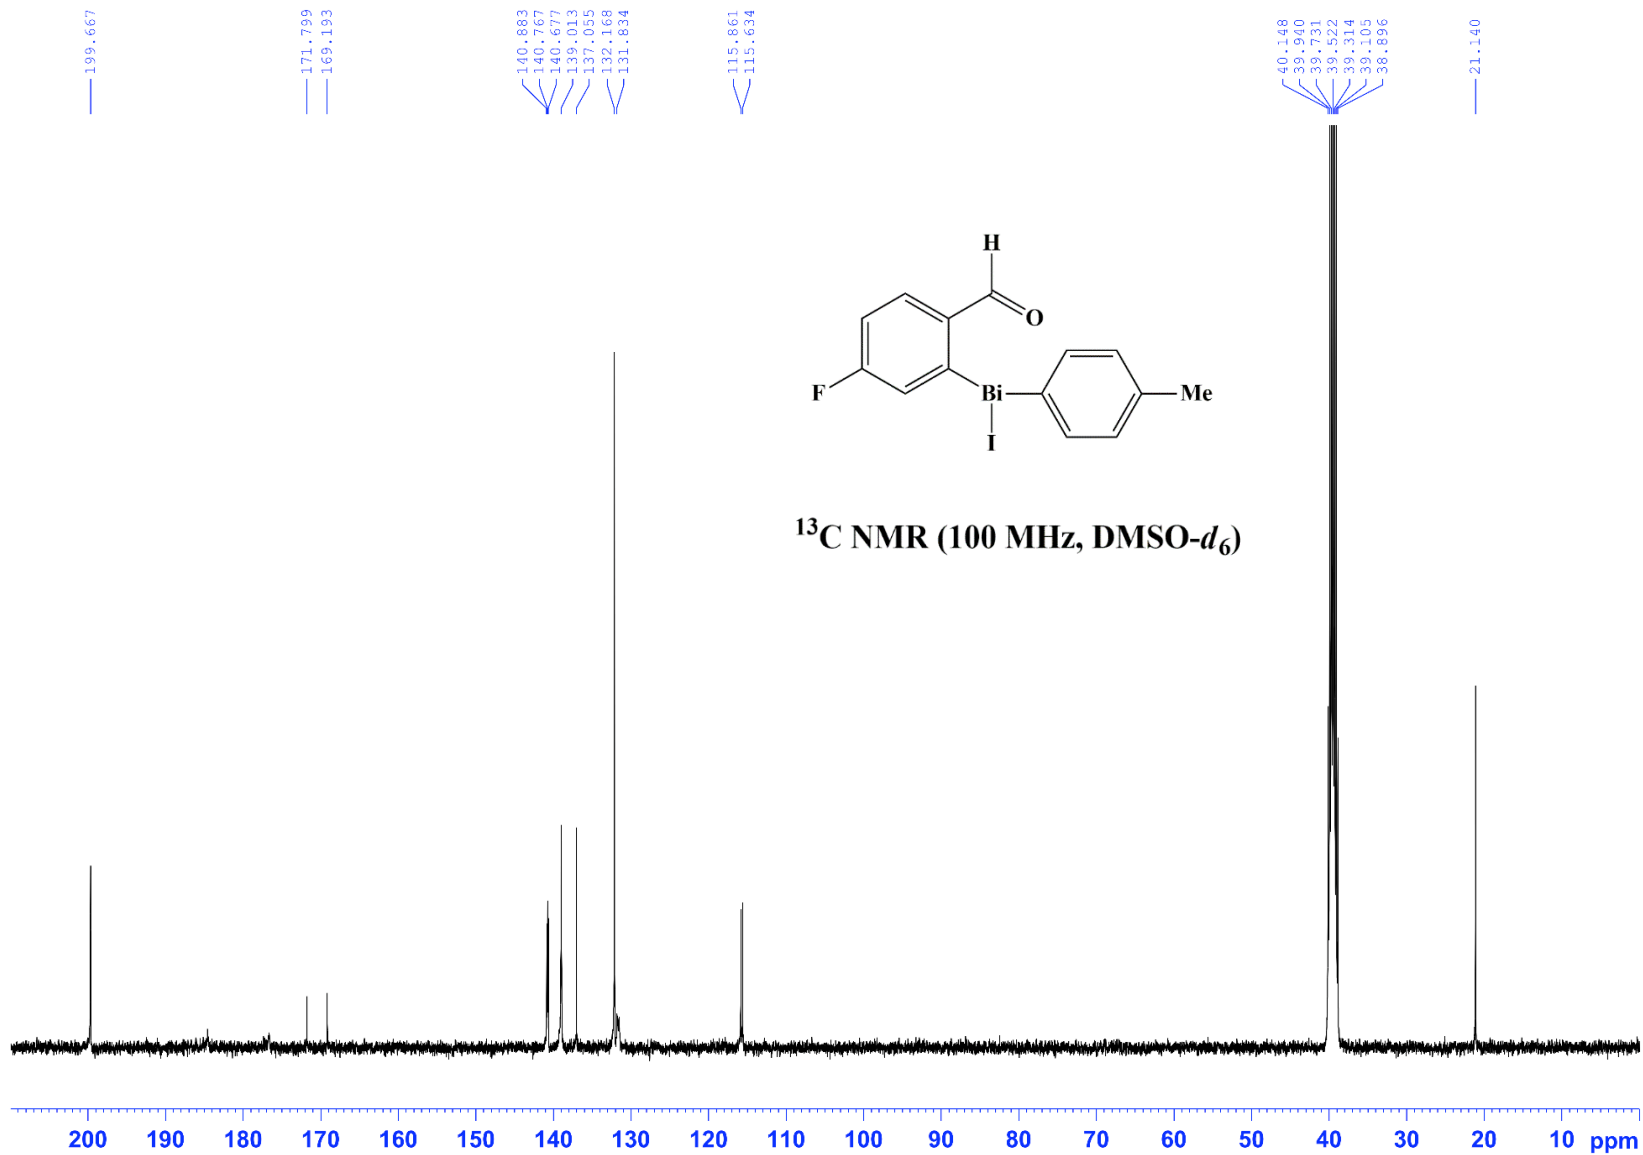

# Compound 8a

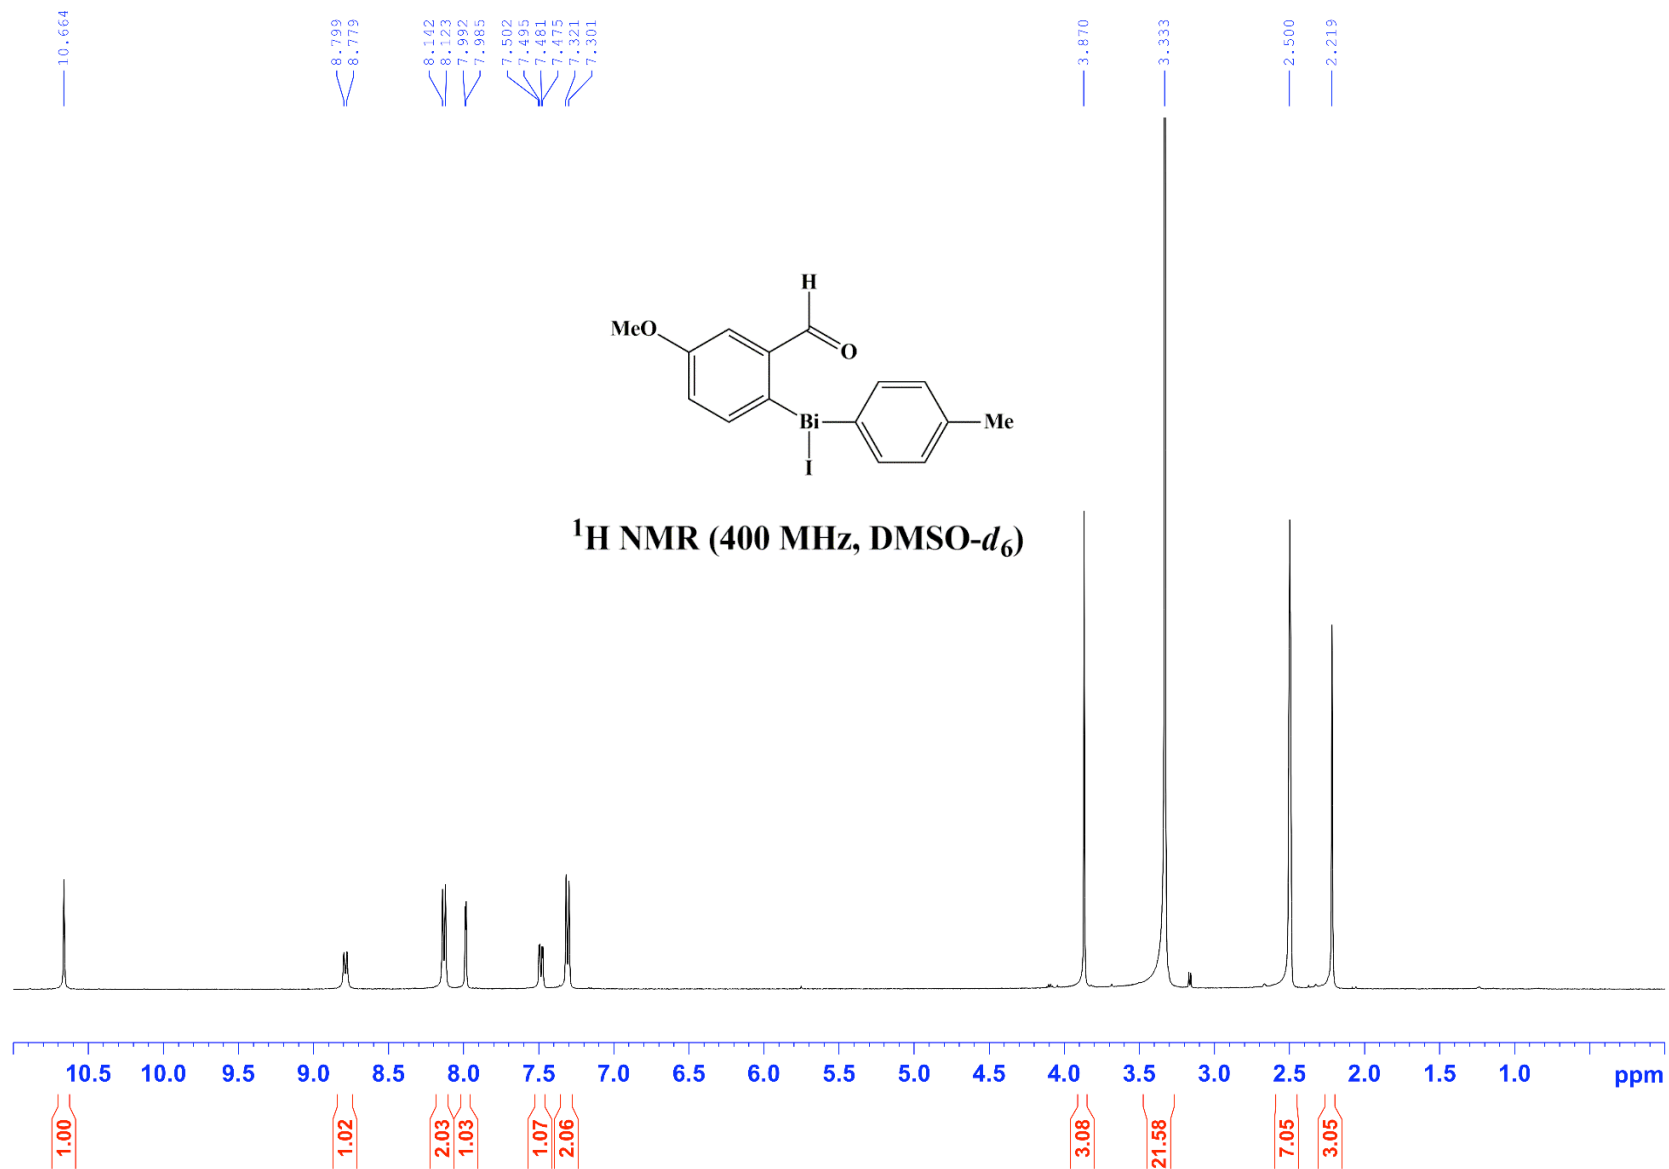

Compound 8a

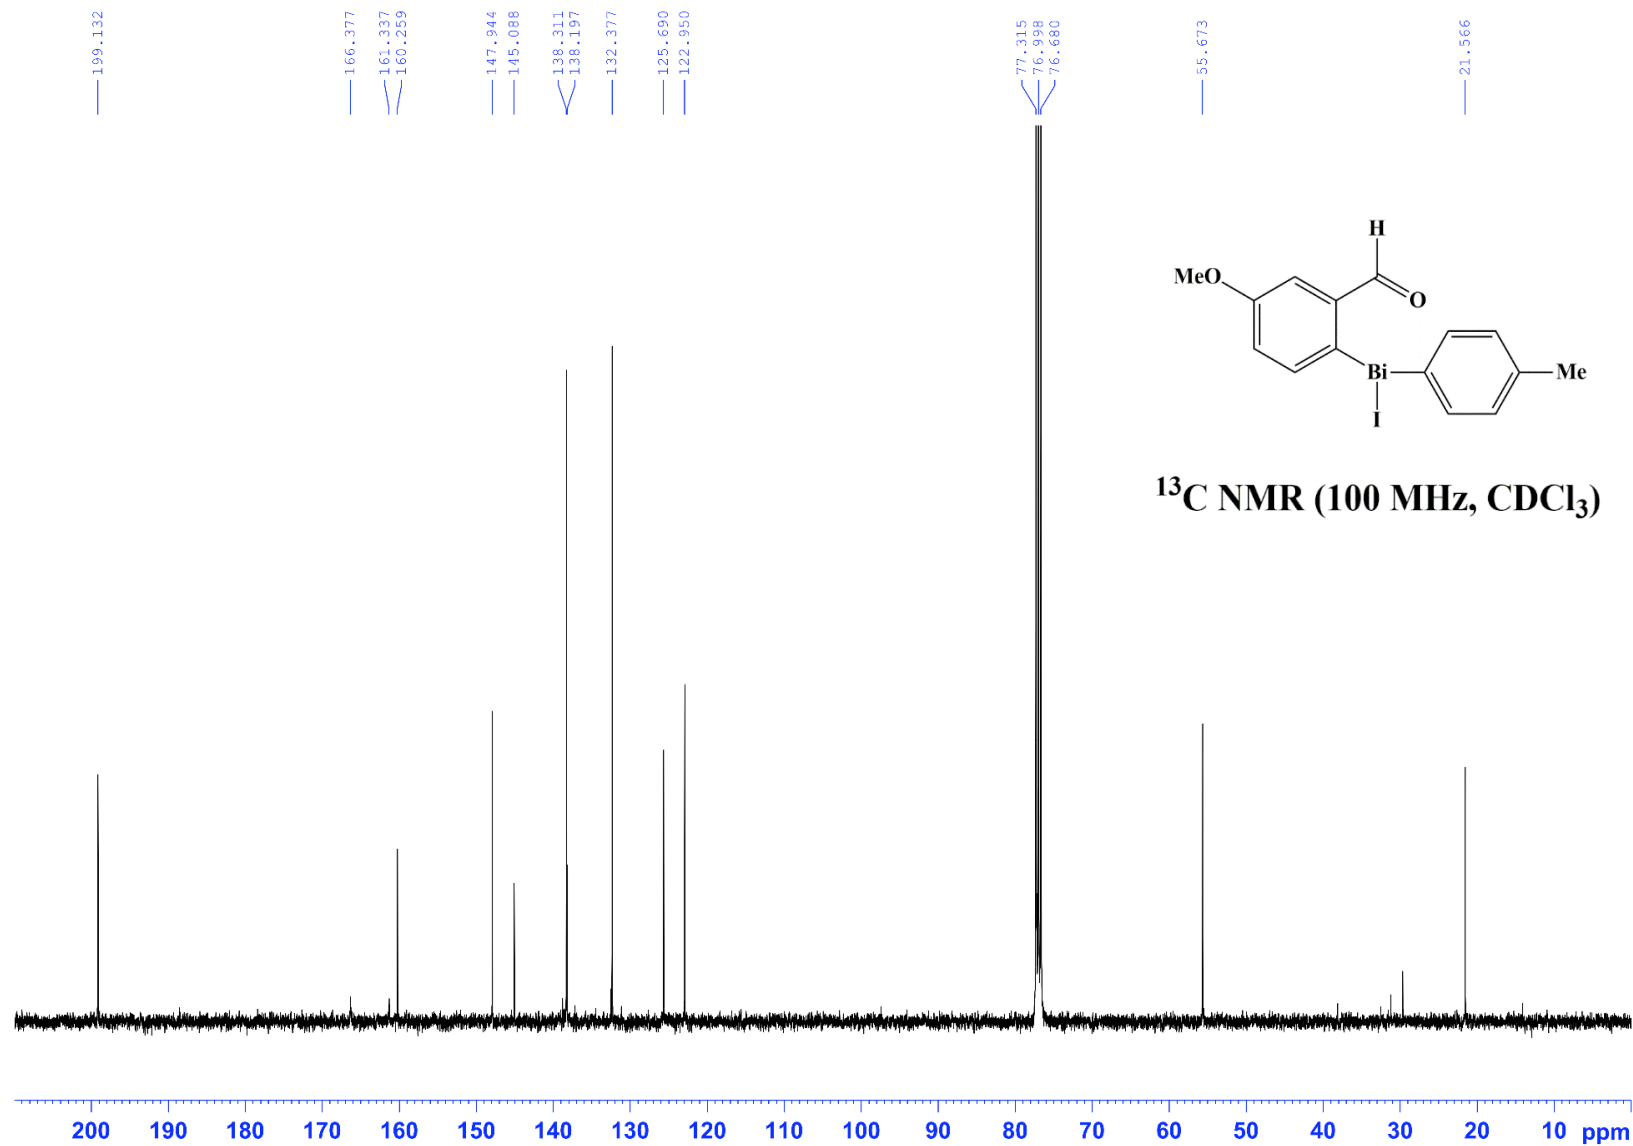



Compound 9a

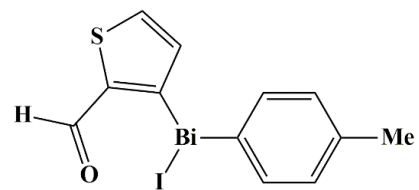

<sup>1</sup>H NMR (400 MHz, CDCl<sub>3</sub>)

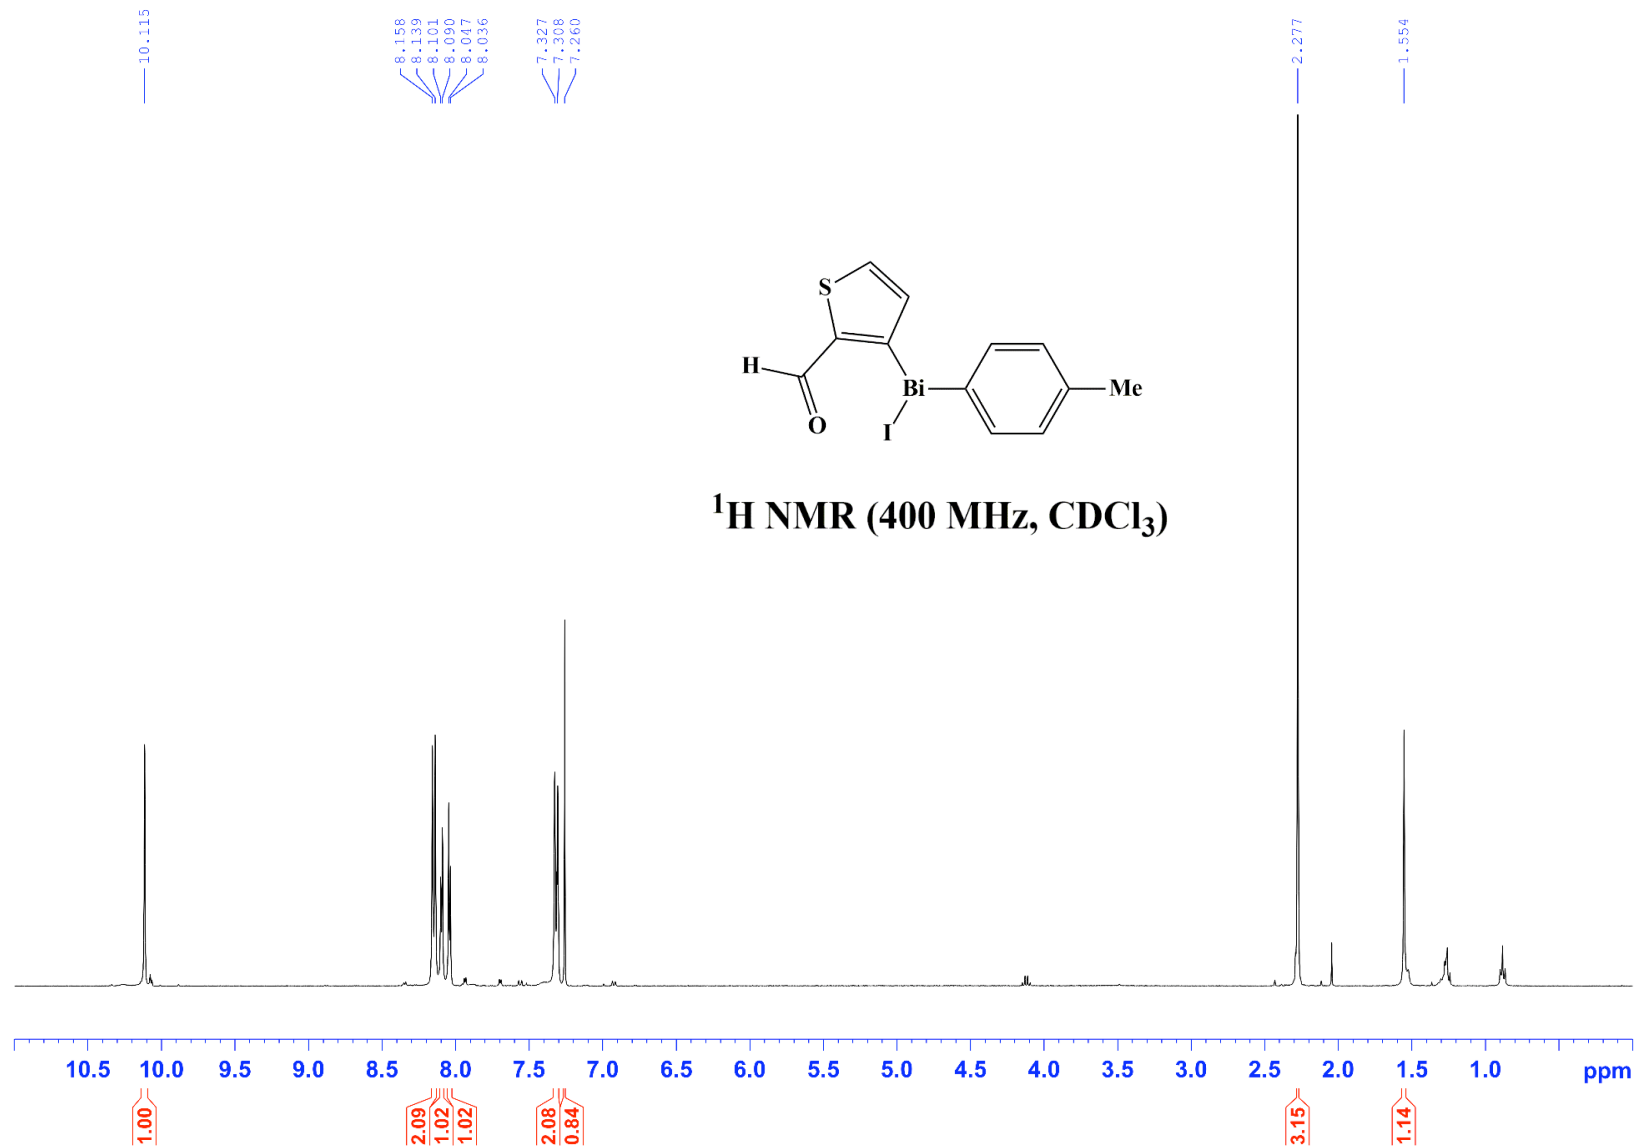

Compound 9a

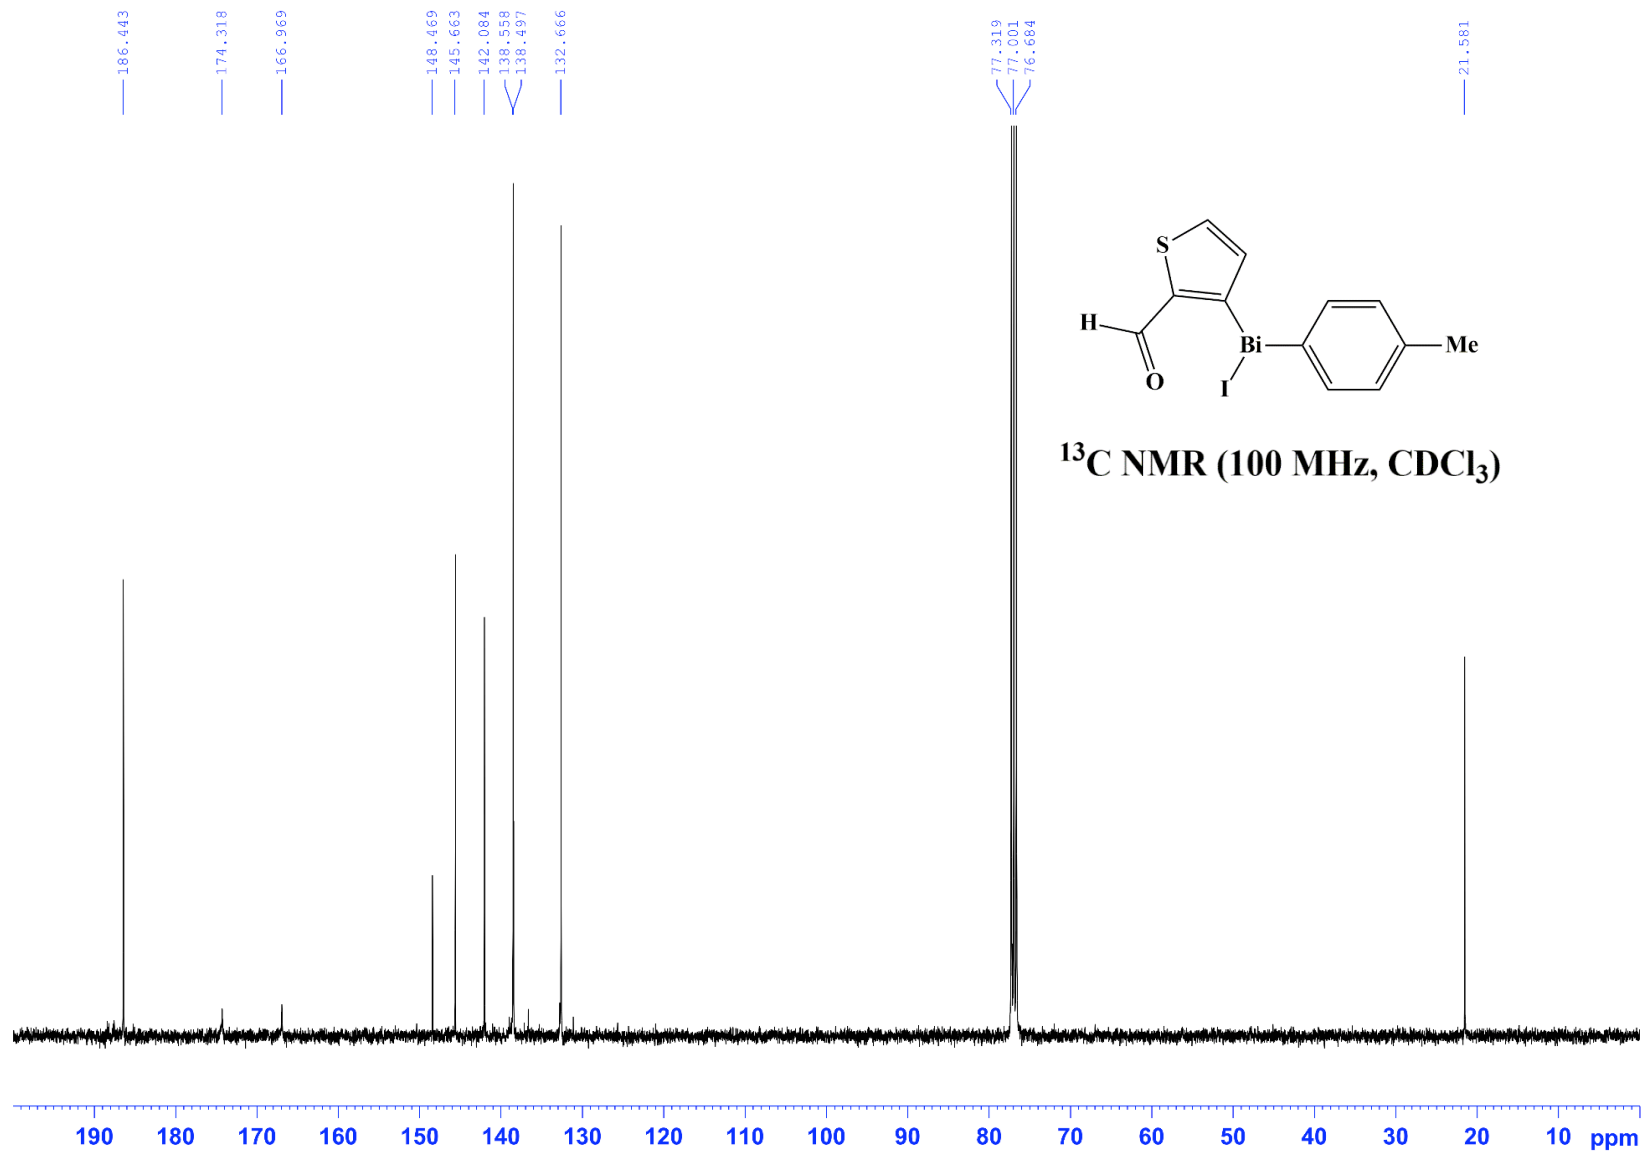

Compound 10a

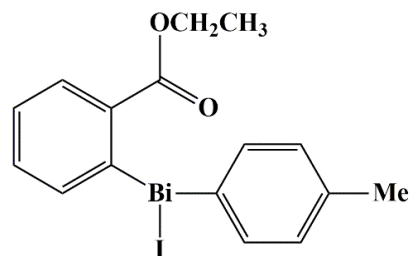

<sup>1</sup>H NMR (400 MHz, CDCl<sub>3</sub>)

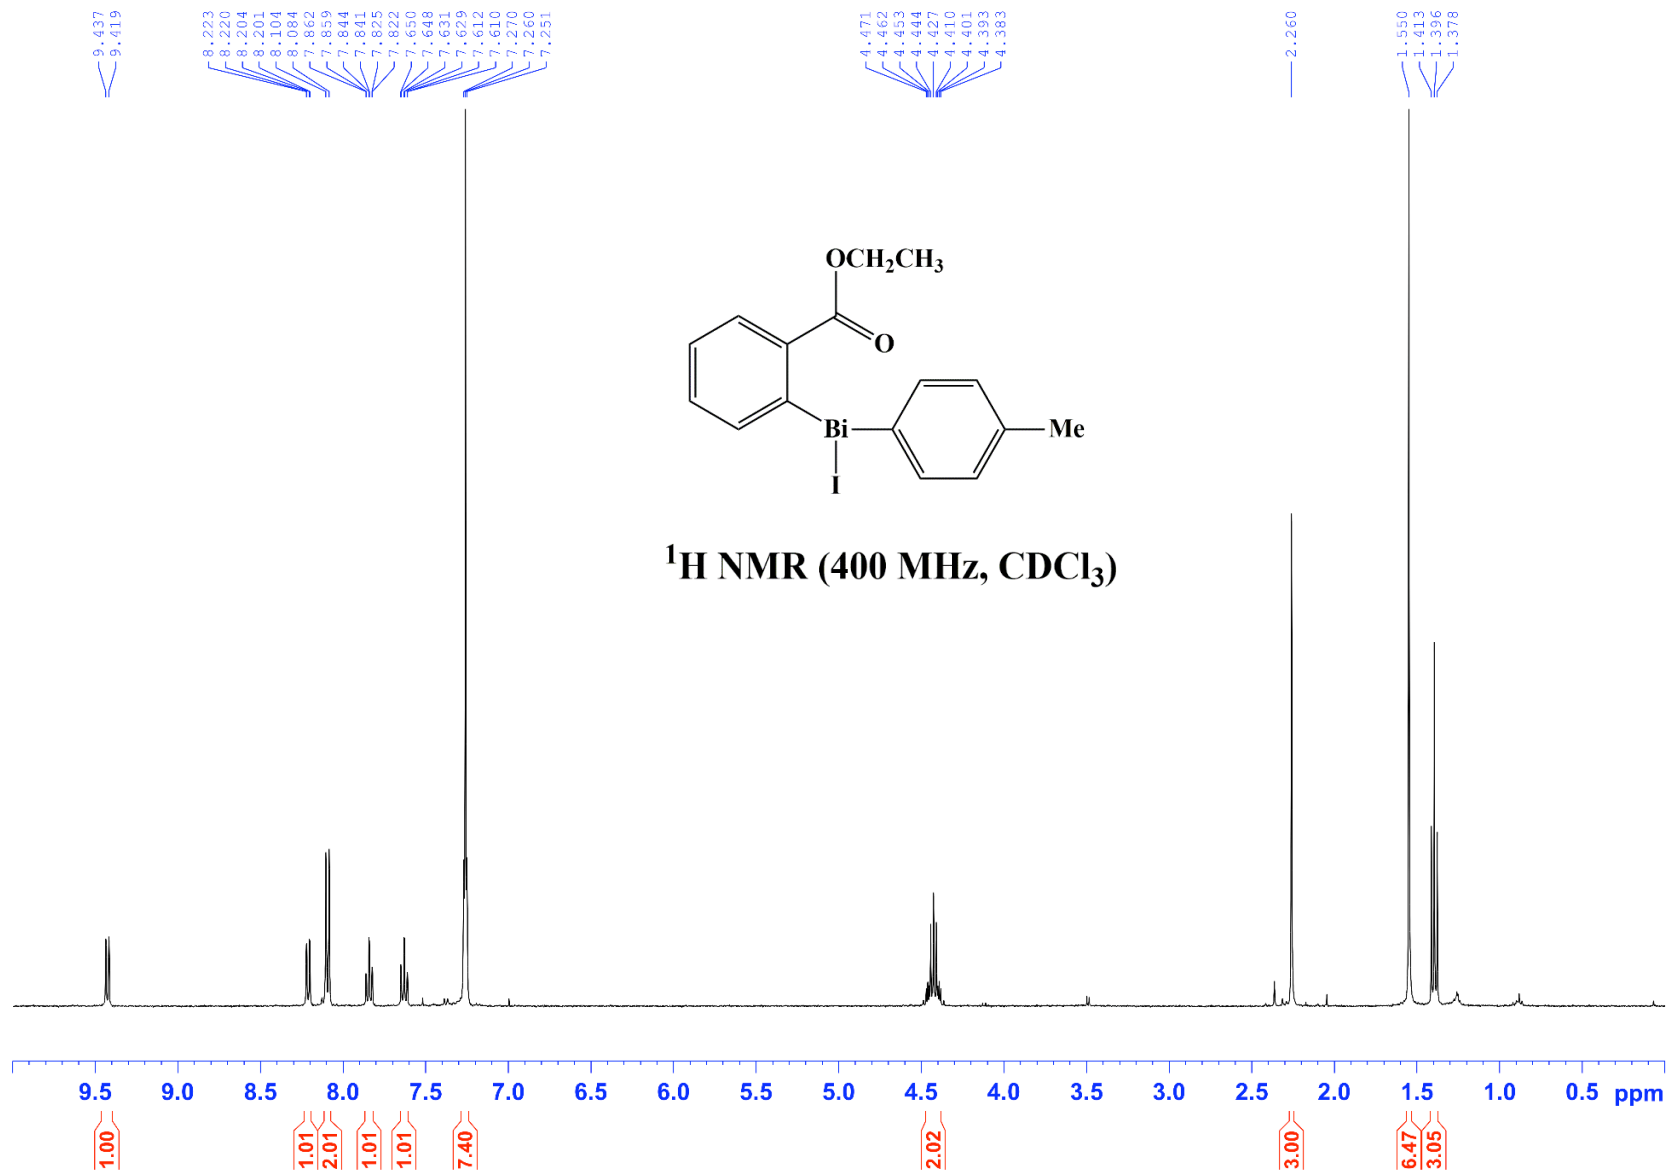

Compound 10a

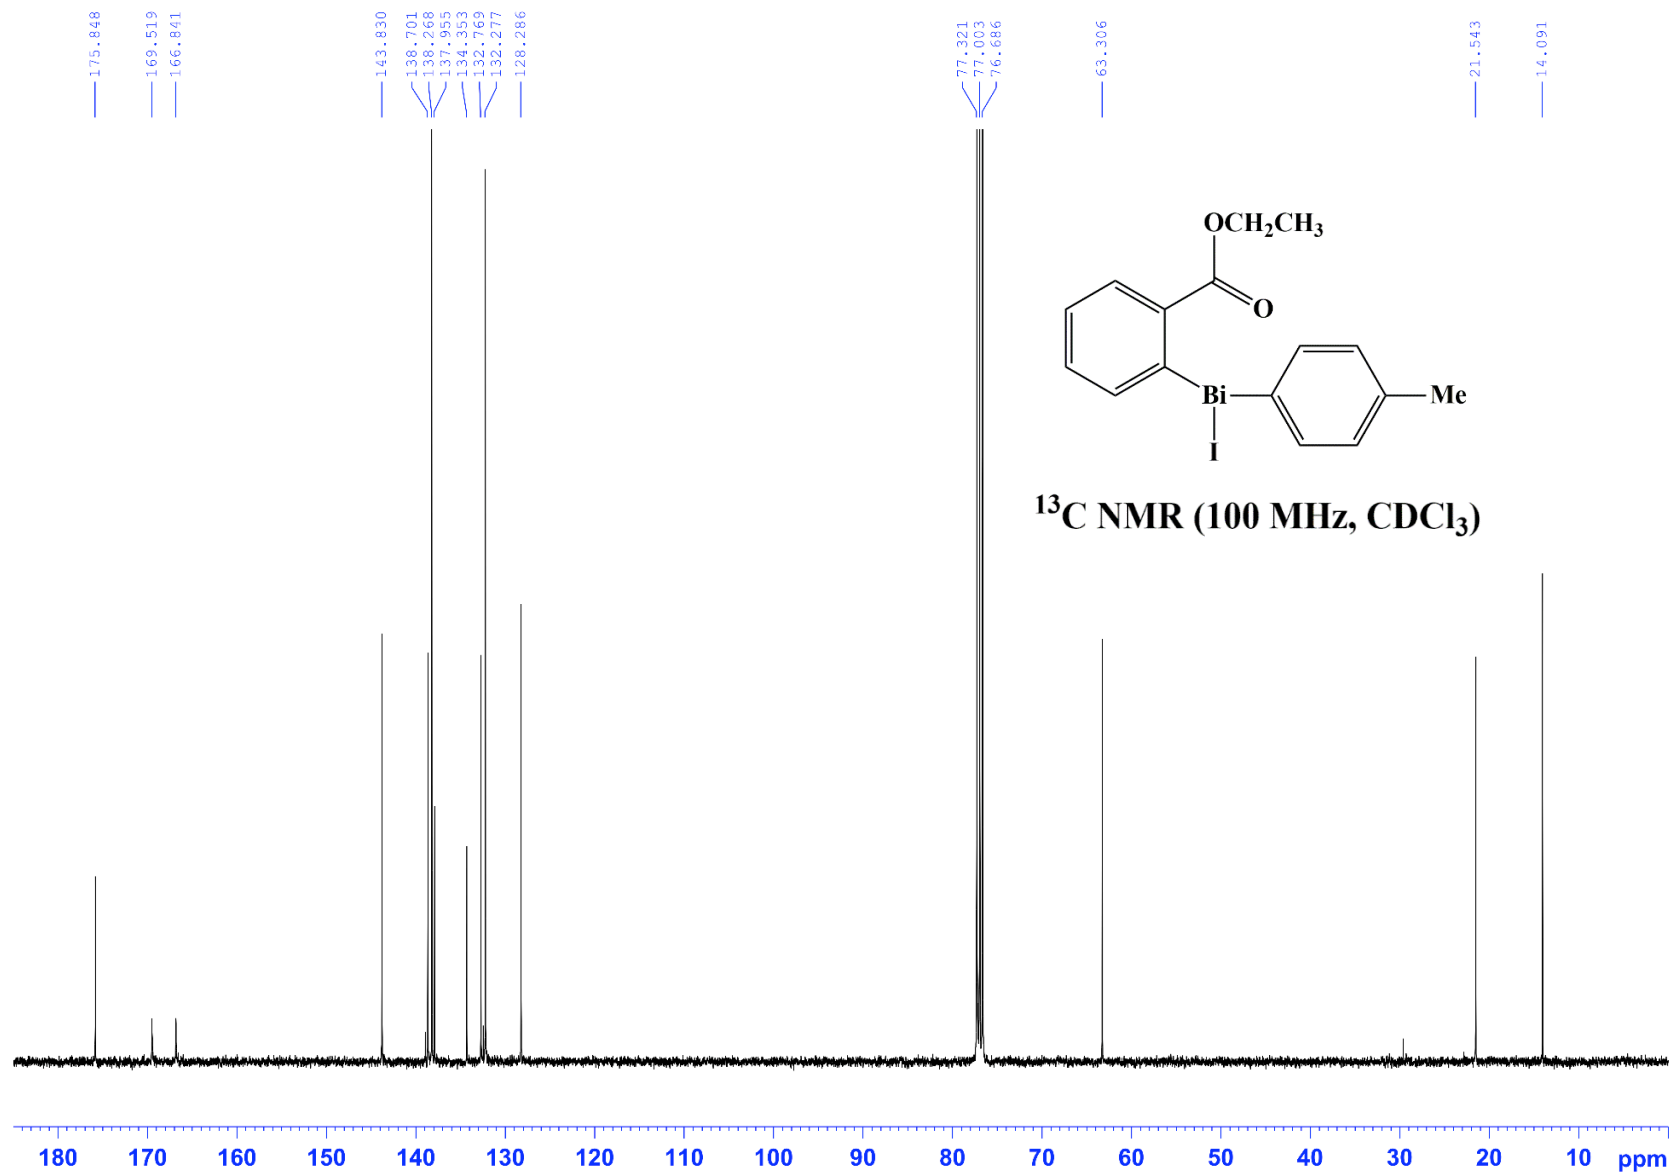

Supplement: f1 [file 2385064.f1.pdf]
